# Supplementary material
Source: PubMed Central journal article supplement (PMC3172002)

# Direct Mannich Reaction with Malonates and Simple Imines by Bifunctional Cinchona Alkaloid Catalysts: Enantioselective Synthesis of $\beta$ -Amino Acids

Jun Song, Yi Wang and Li Deng\*

*Department of Chemistry  
Brandeis University  
Waltham, Massachusetts 02454-9110*

\* To whom correspondence should be addressed

**General Information:**  $^1\text{H}$  and  $^{13}\text{C}$  NMR spectra were recorded on a Varian instrument (400 MHz and 100 MHz, respectively) and internally referenced to tetramethylsilane signal or residual protio solvent signals. Data for  $^1\text{H}$  NMR are reported as follows: chemical shift ( $\delta$ , ppm), multiplicity (s, singlet; d, doublet; t, triplet; q, quartet; m, multiplet), coupling constant (Hz) and integration. Data for  $^{13}\text{C}$  NMR are reported in terms of chemical shift ( $\delta$ , ppm). Infrared spectra were recorded on a Perkin Elmer FT-IR Spectrometer and are reported in frequency of absorption ( $\text{cm}^{-1}$ ). Low resolution mass spectra for all the new compounds were performed by 70SE CI+, and exact mass spectra were recorded on a 70-VSE-B high resolution mass spectrometer. Specific rotations were measured on a Jasco Digital Polarimeter.

High performance liquid chromatography (HPLC) analysis was performed on a Hewlett-Packard 1100 Series instrument equipped with a quaternary pump, using a Daicel Chiralcel OJ, OD Column (250 x 4.6 mm) or Chiralpak AD, AS Column (250 x 4.6 mm) or Regis Pirckle covalent (*R, R*) Whelk-O 1 Column (250 x 4.6 mm). UV absorption was monitored at 220 nm.

## Materials:

Catalysts **Q-1a**, **Q-1b**, **Q-1d** and **QD-1d** were prepared according to literature procedures.<sup>1</sup> Catalysts **2** and **Q-1c** were prepared according to literature procedures.<sup>2</sup>

Aryl *N*-Boc-Imines **4A-4L** were prepared according to literature procedures.<sup>3</sup>

Malonates **5a**, **5b** and  $\beta$ -ketoester **8a** were purchased from Aldirch Inc. Malonate **5c** was purchased from Pfaltz & Bauer, Inc.;  $\beta$ -ketoesters **8b** and **8c** were prepared according to literature procedures.<sup>4</sup>

ACS grade Acetone was used without further purification. Methylene chloride was freshly distilled from calcium hydride under nitrogen atmosphere.

All the commercial reagents were used as received.

<sup>1</sup> Vakulya, B.; Varga, S.; Csámpai, A.; Soós, T. *Org Lett.* **2005**, *7*, 1967

<sup>2</sup> Li, B.; Jiang, L.; Liu, M.; Chen, Y.; Ding, L.; Wu, Y. *Synlett* **2005**, *4*, 603

<sup>3</sup> Wenzel, A. G.; Jacobsen, E. N. *J. Am. Chem. Soc.* **2002**, *124*, 12964

<sup>4</sup> Dezile, R.; Endo, M. US Patent (**1989**), NO. 4831043

## 1. Preparation of Catalyst **3**

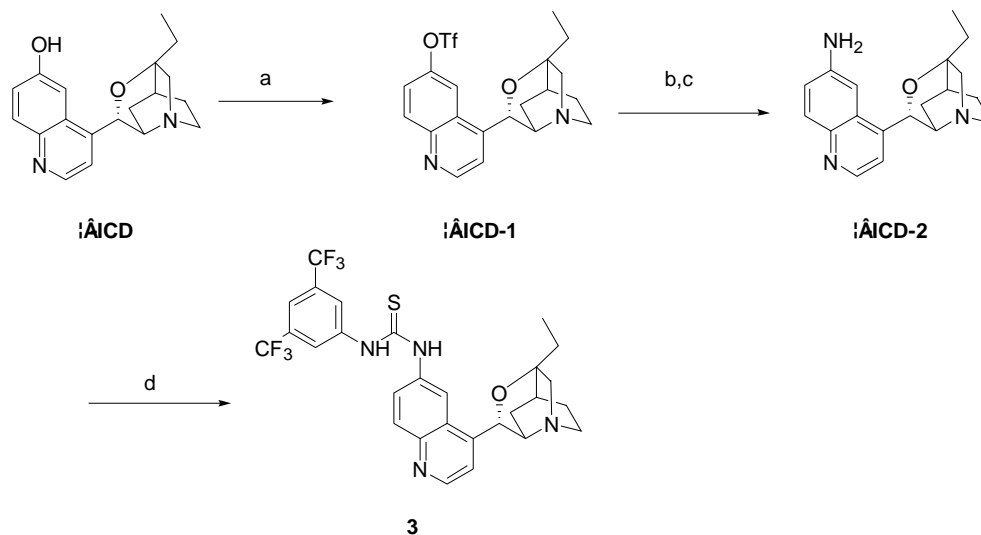

a) PhNTf<sub>2</sub>, NEt<sub>3</sub>, CH<sub>2</sub>Cl<sub>2</sub>; b) Pd(OAc)<sub>2</sub>, BINAP, Cs<sub>2</sub>CO<sub>3</sub>, THF, Ph<sub>2</sub>C=NH; c) NH<sub>2</sub>OH HCl, THF, d) 3,5-(CF<sub>3</sub>)<sub>2</sub>PhNCS, THF

The synthesis of **3** was accomplished by using the procedure described by Corey and Zhang.<sup>5</sup> The starting material  $\beta$ -ICD was prepared according to reported procedure.<sup>6</sup>

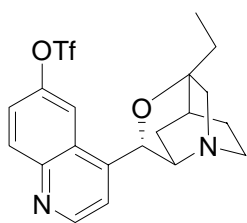

$\beta$ -ICD-1

To a solution of  $\beta$ -ICD (1.24 g, 4.0 mmol) and *N*-phenylbis(trifluoromethanesulfonylimide) (1.71g, 4.8 mmol) in anhydrous methylene chloride (40 mL), was added triethylamine (1.01g, 10 mmol) at room temperature. After stirred at room temperature for 15 h, the reaction mixture was transferred to a separation funnel, washed with saturated sodium carbonate aqueous solution (50 mL) and brine (50 mL). The organic layer was collected, dried over anhydrous sodium sulfate and concentrated under reduced pressure. Silica gel flash chromatography of the residue (3% MeOH and 1% NH<sub>3</sub>·H<sub>2</sub>O in EtOAc) gave crude  $\beta$ -ICD-1 as yellow sticky oil (1.25 g). The crude product was used directly for the next step without further purification.

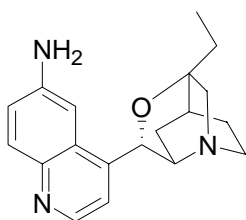

$\beta$ -ICD-2

The crude  $\beta$ -ICD-1 (1.25 g), palladium acetate (128 mg, 0.57 mmol), BINAP (175 mg, 0.275 mmol), cesium carbonate (1.38 g, 4.23 mmol), and benzophenone imine (1.03 g, 5.7 mmol) were suspended in THF (35 mL). The reaction mixture was refluxed with stirring for 24 h. Then the reaction mixture was cooled to room temperature, diluted with EtOAc (20 mL), washed with 5% sodium carbonate aqueous solution (30 mL) and brine (30 mL). The organic layer was collected, dried over anhydrous sodium sulfate and concentrated under reduced

<sup>5</sup> Corey, E. J.; Zhang, J. *Org. Lett.* **2001**, 3, 3211

<sup>6</sup> Iwabuchi, Y.; Nakatani, M.; Yokoyama, N.; Hatakeyama, S. *J. Am. Chem. Soc.* **1999**, 121, 10219

pressure to yield crude imine that was hydrolyzed without further purification. To the solution of the residue (1.05 g) in methanol (25 mL), was added  $\text{NH}_2\text{OH}\cdot\text{HCl}$  (306 mg, 4.4 mmol) and  $\text{NaOAc}$  (541 mg, 6.6 mmol). The reaction mixture was stirred for 3 h at room temperature. Then the reaction mixture was concentrated and extracted with saturated  $\text{Na}_2\text{CO}_3$  (aq.) and  $\text{CH}_2\text{Cl}_2$  ( $v : v = 1:1$ , 20 mL, 8 times). All extractions were combined. Organic layers were collected, washed with brine (60 mL), dried over anhydrous sodium sulfate and concentrated. Pure  $\beta$ -ICD-2 was obtained as a red foam by flash chromatography (silica gel: EtOAc: MeOH :  $\text{NH}_3\cdot\text{H}_2\text{O} = 90 : 6 : 1$ ) (524 mg, 1.7 mmol, 43% yield from  $\beta$ -ICD).  $[\alpha]_{\text{D}}^{25} = 141.2$  ( $c = 0.72$ ,  $\text{CHCl}_3$ );  $^1\text{H NMR}$  (400 MHz,  $\text{CDCl}_3$ )  $\delta$  1.03 (t,  $J = 8.0$  Hz, 3H), 1.26 (q,  $J = 6.0$  Hz, 1H), 1.46-1.84 (m, 4H), 2.14-2.16 (m, 1H), 2.70 (d,  $J = 13.6$  Hz, 1H), 3.02-3.06 (m, 2H), 3.36 (brs, 1H), 3.50-3.62 (m, 2H), 4.12 (s, 2H), 5.88 (s, 1H), 7.06-7.14 (m, 2H) 7.62 (d,  $J = 4.4$  Hz, 1H), 7.90 (d,  $J = 8.4$  Hz, 1H), 8.66 (d,  $J = 4.4$  Hz, 1H);  $^{13}\text{C NMR}$  (100 MHz,  $\text{CDCl}_3$ )  $\delta$  7.31, 23.39, 24.03, 27.34, 32.76, 46.62, 54.63, 56.29, 73.00, 77.07, 102.34, 119.04, 120.83, 126.77, 131.45, 141.44, 142.87, 144.97, 146.38; **IR** (neat)  $\nu$  3325, 2962, 1621, 1514; **HRMS**: calc'd for  $(\text{M}+\text{H})^+$   $\text{C}_{19}\text{H}_{24}\text{N}_3\text{O}_6$ : 310.1919; found 310.1916.

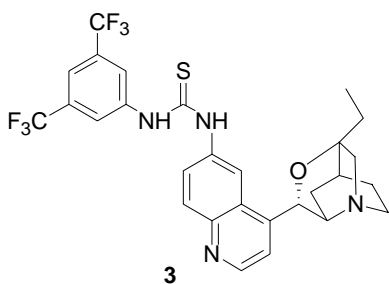

To a solution of  $\beta$ -ICD-2 (260 mg, 0.85 mmol) in THF (10 mL) was added 3,5-bis-trifluoromethylphenyl isothiocyanate (255 mg, 0.94 mmol) and the reaction mixture was stirred for 16 h at room temperature. The reaction mixture was concentrated and the crude product was purified by flash chromatograph (silica gel: EtOAc : MeOH :  $\text{NH}_3\cdot\text{H}_2\text{O} = 100 : 2 : 1$ ). This yielded **3** as white foam (410 mg, 0.71 mmol, 84% yield).  $[\alpha]_{\text{D}}^{25} = 75.7$  ( $c = 0.63$ ,  $\text{CHCl}_3$ );  $^1\text{H NMR}$  (400 MHz,  $\text{CD}_3\text{OD}$ )  $\delta$  1.04 (t,  $J = 7.2$  Hz, 3H), 1.32-1.42 (m, 1H), 1.50-1.62 (m, 1H), 1.62-1.82 (m, 4H), 2.12-2.18 (m, 1H), 2.80-2.86 (m, 1H), 3.00-3.10 (m, 2H), 3.30 (brs, 1H), 3.45-3.60 (m, 2H), 4.91 (s, 2H), 5.94 (s, 1H), 7.69 (s, 1H), 7.80-7.84 (m, 1H), 7.90-8.08 (m, 3H), 8.25 (s, 1H), 8.83 (d,  $J = 4.4$  Hz, 1H);  $^{13}\text{C NMR}$  (100 MHz,  $\text{CD}_3\text{OD}$ )  $\delta$  6.39, 23.86, 23.33, 27.11, 32.96, 46.10, 53.82, 56.75, 72.82, 77.41, 117.21, 119.63, 122.18, 123.55, 124.88, 125.84, 127.98, 129.36, 131.48 (q,  $J = 34$  Hz), 137.78, 141.92, 145.35, 149.36, 181.53; **IR** (neat)  $\nu$  2918, 1614, 1277, 1120, 1174; **HRMS**: calc'd for  $(\text{M}+\text{H})^+$   $\text{C}_{28}\text{H}_{27}\text{N}_4\text{OSF}_6$ : 581.1810; found 581.1812.

## 2. Catalyst Screening

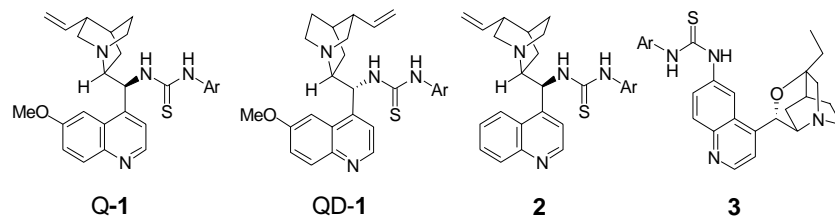

**1a** Ar = 4-*t*-Bu-Ph-; **1b** Ar = 2-*i*-Pr-Ph-;  
**1c** Ar = Ph-; **1d** Ar = 3,5-*bis*CF<sub>3</sub>Ph-

**2,3**: Ar = 3,5-*bis*CF<sub>3</sub>Ph-

**Figure 1.** C6' or C9 thiourea cinchona alkaloid derivatives.

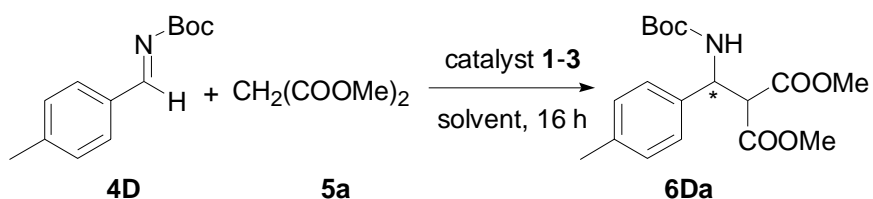

| entry           | cat.      | temp (°C) | solvent                         | conv./% <sup>b</sup> | ee/% <sup>c</sup> |
|-----------------|-----------|-----------|---------------------------------|----------------------|-------------------|
| 1               | Q-1a      | RT        | CH <sub>2</sub> Cl <sub>2</sub> | >98                  | 57                |
| 2               | Q-1b      | RT        | CH <sub>2</sub> Cl <sub>2</sub> | >98                  | 43                |
| 3               | Q-1c      | RT        | CH <sub>2</sub> Cl <sub>2</sub> | >98                  | 62                |
| 4               | Q-1d      | RT        | CH <sub>2</sub> Cl <sub>2</sub> | >98                  | 77                |
| 5               | QD-1d     | RT        | CH <sub>2</sub> Cl <sub>2</sub> | >98                  | -74               |
| 6               | <b>2</b>  | RT        | CH <sub>2</sub> Cl <sub>2</sub> | >98                  | 65                |
| 7               | <b>3</b>  | RT        | CH <sub>2</sub> Cl <sub>2</sub> | >98                  | 72                |
| 8               | Q-1d      | RT        | CH <sub>3</sub> CN              | >98                  | 83                |
| 9               | Q-1d      | RT        | Acetone                         | >98                  | 77                |
| 10              | Q-1d      | -20       | CH <sub>2</sub> Cl <sub>2</sub> | >98                  | 80                |
| 11              | Q-1d      | -20       | CH <sub>3</sub> CN              | >98                  | 74                |
| 12              | Q-1d      | -20       | Acetone                         | >98                  | 85                |
| 13 <sup>d</sup> | Q-1d      | -60       | Acetone                         | >98                  | 93                |
| 14 <sup>d</sup> | Quinidine | -60       | Acetone                         | >98                  | 25                |
| 15 <sup>d</sup> | <b>3</b>  | -60       | Acetone                         | >98                  | 0                 |

<sup>a</sup> Unless noted, reactions were run with 0.05 mmol of **4D**, 0.15 mmol of **5a** in 0.10 mL of solvent with 10 mol% catalyst at room temperature for 16 h. <sup>b</sup> Determined by <sup>1</sup>H NMR analysis. <sup>c</sup> Determined by HPLC analysis. <sup>d</sup> Reaction was run with catalyst (20 mol%) at -60 °C for 24 h.

### 3. General procedure for the preparation of *N*-Boc imine **4M**, **4N**, **4O**

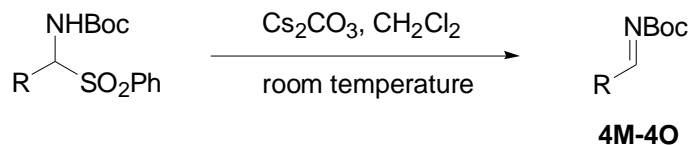

To a round bottom flask (50 mL) was added cesium carbonate (1.64 g, 10.0 mmol). The solids were placed under vacuum and flame-dried. Once cool, anhydrous methylene chloride (10 mL) was added under a positive stream of nitrogen, followed by the addition of *N*-(*tert*-butoxycarbonyl)- $\alpha$ -(phenylsulfonyl)alkylamine (1.0 mmol)<sup>3</sup>. The reaction mixture was stirred at room temperature for 4 to 10 h. Then reaction mixture was cooled to 0 °C by ice-water bath, diluted with hexanes (10 mL, pre-cooled with ice-water bath). The organic layer was washed with water (10 mL, twice, pre-cooled with ice-water bath), brine (10 mL) and dried over anhydrous sodium sulfate. Solvent was removed by rotavap under reduced pressure (water bath temperature was kept below 15 °C) to give pure *N*-Boc imine. The *N*-Boc imine was used for Mannich reaction immediately.

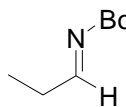 **(4M)** Reaction was performed in 1.0-mmol scale using the general procedure. After 4 h, **4M** was isolated as a colorless liquid (124 mg, 79%). <sup>1</sup>H NMR (400 MHz, CDCl<sub>3</sub>)  $\delta$  1.16 (t, *J* = 7.2 Hz, 3H), 1.53 (s, 9H), 2.43 (brs, 2H), 8.32 (brs, 1H); <sup>13</sup>C NMR (100 MHz, CDCl<sub>3</sub>)  $\delta$  8.67, 27.73, 29.42, 81.96, 161.98, 175.75; IR (neat)  $\nu$  2928, 1721, 1667, 1160;

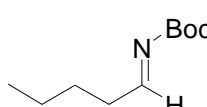 **(4N)** Reaction was performed in 2.0-mmol scale using the general procedure. After 7 h, **4N** was isolated as a colorless liquid (327 mg, 89%). <sup>1</sup>H NMR (400 MHz, CDCl<sub>3</sub>)  $\delta$  0.93 (t, *J* = 7.6 Hz, 3H), 1.39 (q, *J* = 7.2 Hz, 2H), 1.53 (s, 9H), 1.60 (m, 2H), 2.40 (brs, 2H), 8.31 (brs, 1H); <sup>13</sup>C NMR (100 MHz, CDCl<sub>3</sub>)  $\delta$  13.62, 22.15, 26.72, 27.67, 35.78, 81.80, 161.98, 175.48; IR (neat)  $\nu$  2962, 2928, 1723, 1666, 1456, 1364, 1253, 1160;

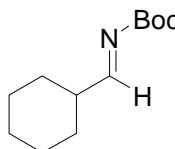 **(4O)** Reaction was performed in 5.0-mmol scale using the general procedure. After 10 h, **4O** was obtained as a colorless oil (1.01 g, 96%). The spectrum data was identical to the reported value<sup>7</sup>.

<sup>7</sup> After the submission of this paper, a similar procedure to make **4O** was reported online. Trost, B. M.; Jaratjaroonphong, J.; Reutrakul, V. *J. Am. Chem. Soc.* **2006**, *128*, 2778

#### 4. General Procedure for Enantioselective Mannich Reaction of Malonate **5** to Aryl Imine **4**:

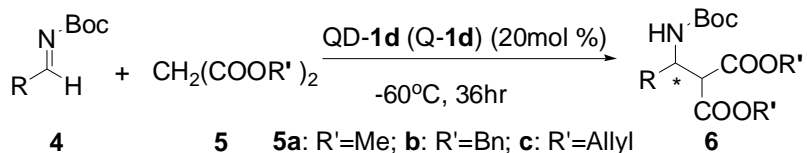

To a solution of imine **4** (0.20 mmol) and chiral catalyst (20 mol%) in acetone (0.40 mL) at  $-60^\circ\text{C}$ , was added malonate **5** (0.30 mmol) in one portion. The resulting mixture was kept at  $-60^\circ\text{C}$  for 36 h. The reaction mixture was diluted with ethyl ether (5 ml) and allowed to pass through a short silica gel column. Then the filtrate was concentrated and purified by silica gel flash chromatography using the solvent specified below.

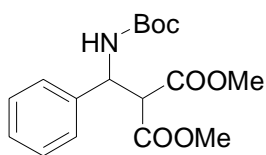

**6Aa**

**(+)-6Aa** This product was obtained as a white solid (61 mg) in 90% yield after flash chromatography (silica gel: Ethyl ether / Hexane = 1 / 5) and in 97% ee as determined by HPLC [Daicel Chiralpak AD, Hexane / IPA = 90 / 10,  $1.0\text{ ml}\cdot\text{min}^{-1}$ ,  $\lambda = 220\text{ nm}$ ,  $t_r$  (major) = 16.15 min,  $t_r$  (minor) = 21.51 min] from a reaction catalyzed by **QD-1d** (20 mol%) at  $-60^\circ\text{C}$  for 36 h.  $[\alpha]_D^{25} = 16.8$  ( $c = 0.90$ ,  $\text{CHCl}_3$ );  **$^1\text{H NMR}$**  (400 MHz,  $\text{CDCl}_3$ )  $\delta$  1.42 (s, 9H), 3.63 (s, 3H), 3.73 (s, 3H), 3.94 (s, 1H), 5.49 (brs, 1H), 6.17 (brs, 1H), 7.20-7.40 (m, 5H);  **$^{13}\text{C NMR}$**  (100 MHz,  $\text{CDCl}_3$ )  $\delta$  28.14, 52.41, 52.74, 53.27, 56.55, 79.62, 126.08, 127.53, 128.49, 139.27, 154.98, 167.44, 168.27; **IR** (neat)  $\nu$  3387, 1719, 1497, 1246, 1164 ; **HRMS**: calc'd for  $(\text{M}+\text{Na})^+$   $\text{C}_{17}\text{H}_{23}\text{NO}_6\text{Na}$ : 360.1423; found 360.1420.

**(-)-6Aa** This product was obtained as a white solid in 91% yield and 93% ee from a reaction catalyzed by **Q-1d** (20 mol%) at  $-60^\circ\text{C}$  for 36 h.

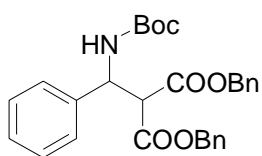

**6Ab**

**(+)-6Ab** This product was obtained as a colorless oil (98 mg) in 99% yield after flash chromatography (silica gel: Ethyl acetate / Hexane = 1/15) and in 96% ee as determined by HPLC [Regis Pirkle Covalent (*R, R*) Whelk-O 1, Hexane / IPA = 99 / 1,  $1.0\text{ ml}\cdot\text{min}^{-1}$ ,  $\lambda = 220\text{ nm}$ ,  $t_r$  (major) = 14.89 min,  $t_r$  (minor) = 12.49 min] from a reaction catalyzed by **QD-1d** (20 mol%) at  $-60^\circ\text{C}$  for 36 h.  $[\alpha]_D^{25} = 14.0$  ( $c = 0.98$ ,  $\text{CHCl}_3$ );  **$^1\text{H NMR}$**  (400 MHz,  $\text{CDCl}_3$ )  $\delta$  1.41 (s, 9H), 4.01 (s, 1H), 5.04 (s, 2H), 5.13 (dd,  $J = 8.0\text{ Hz}$ ,  $12.0\text{ Hz}$ , 2H), 5.56 (brs, 1H), 6.20 (brs, 1H), 7.06-7.12 (m, 2H), 7.20-7.36 (m, 13H);  **$^{13}\text{C NMR}$**  (100 MHz,  $\text{CDCl}_3$ )  $\delta$  28.22, 53.41, 56.81, 67.21, 67.61, 79.65, 126.15, 127.55, 127.98, 128.21, 128.25, 128.35, 128.43, 128.52, 128.53, 134.78, 134.90, 139.21, 154.98, 166.78, 167.76; **IR** (neat)  $\nu$  3423, 1720, 1497, 1254, 1162 ; **HRMS**: calc'd for  $(\text{M}+\text{H})^+$   $\text{C}_{29}\text{H}_{32}\text{NO}_6$ : 490.2230; found 490.2227.

**(-)-6Ab** This product was obtained as a colorless oil in 99% yield and 94% ee from a reaction catalyzed by **Q-1d** (20 mol%) at  $-60^\circ\text{C}$  for 36 h.

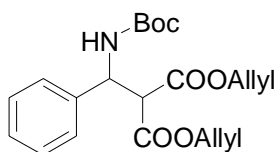

**6Ac**

**(+)-6Ac** This product was obtained as a colorless oil (71 mg) in 91% yield after flash chromatography (silica gel: Ethyl acetate / Hexane = 1 / 6) and in 98% ee as determined by HPLC [Daicel Chiralpak AS, Hexane / IPA = 98 / 2, 1.0 ml·min<sup>-1</sup>, λ = 220 nm, t<sub>r</sub> (major) = 12.63 min, t<sub>r</sub> (minor) = 11.00 min] from a reaction catalyzed by QD-1d (20 mol%) at -60 °C for 36 h. [α]<sub>D</sub><sup>25</sup> = 12.3 (c = 1.22, CHCl<sub>3</sub>); <sup>1</sup>H NMR (400 MHz, CDCl<sub>3</sub>) δ 1.41 (s, 9H), 3.98 (s, 1H), 4.42-4.72(m, 4H), 5.08-5.18 (m, 2H), 5.20-5.38 (m, 2H), 5.53 (brs, 1H), 5.66-5.80 (m, 1H), 5.82-5.94(m, 1H), 6.20 (brs, 1H), 7.20-7.40 (m, 5H); <sup>13</sup>C NMR (100 MHz, CDCl<sub>3</sub>) δ 28.23, 53.36, 56.82, 66.07, 66.45, 79.64, 116.68, 118.95, 126.20, 127.58, 128.55, 131.05, 131.21, 139.33, 154.96, 166.68, 167.59; IR (neat) ν 3431, 1722, 1497, 1250, 1166; HRMS: calc'd for (M+Na)<sup>+</sup> C<sub>21</sub>H<sub>27</sub>NO<sub>6</sub>Na: 412.1736; found 412.1727.

**(-)-6Ac** This product was obtained as a colorless oil in 86% yield and 92% ee from a reaction catalyzed by Q-1d (20 mol%) at -60 °C for 36 h.

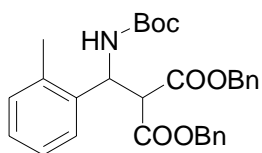

**6Bb**

**(+)-6Bb** This product was obtained as a colorless oil (99 mg) in 97% yield after flash chromatography (silica gel: Ethyl acetate / Hexane = 1 / 15) and in 99% ee as determined by HPLC [Daicel chiralpak AS, Hexane / IPA = 95 / 5, 1.0 ml·min<sup>-1</sup>, λ = 220nm, t<sub>r</sub> (major) = 11.70 min, t<sub>r</sub> (minor) = 7.50 min] from a reaction catalyzed by QD-1d at -60 °C for 36 h. [α]<sub>D</sub><sup>25</sup> = 0.20 (c = 2.00, CHCl<sub>3</sub>); <sup>1</sup>H NMR (400 MHz, CDCl<sub>3</sub>) δ 1.38 (s, 9H), 2.40 (s, 3H), 3.86 (s, 1H), 5.00-5.22 (m, 4H), 5.72 (brs, 1H), 6.23 (brs, 1H), 7.06-7.20 (m, 6H), 7.20-7.40 (m, 8H); <sup>13</sup>C NMR (100 MHz, CDCl<sub>3</sub>) δ 19.02, 28.22, 50.41, 55.41, 67.27, 67.51, 79.61, 125.48, 126.23, 127.60, 128.03, 128.29, 128.46, 128.52, 130.73, 134.79, 135.02, 137.58, 154.83, 166.76, 167.75; IR (neat) ν 3422, 1718, 1498, 1164; HRMS: calc'd for (M+H)<sup>+</sup> C<sub>30</sub>H<sub>34</sub>NO<sub>6</sub>: 504.2386; found 504.2382.

**(-)-6Bb** This product was obtained as a colorless oil in 96% yield and 95% ee from a reaction catalyzed by Q-1d (20 mol%) at -60 °C for 36 h.

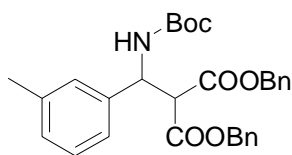

**6Cb**

**(+)- 6Cb** This product was obtained as a colorless oil (103 mg) in 99% yield after flash chromatography (silica gel: Ethyl acetate / Hexane = 1 / 12) and in 98% ee as determined by HPLC [Daicel Chiralcel OD, Hexane / IPA = 90 : 10, 0.5 ml·min<sup>-1</sup>, λ = 220 nm, t<sub>r</sub> (major) = 16.61 min, t<sub>r</sub> (minor) = 14.19 min] from a reaction catalyzed by QD-1d at -60 °C for 36 h. [α]<sub>D</sub><sup>25</sup> = 15.4 (c = 2.00, CHCl<sub>3</sub>); <sup>1</sup>H NMR (400 MHz, CDCl<sub>3</sub>) δ 1.41 (s, 9H), 2.23 (s, 3H), 4.01 (s, 1H), 5.06 (s, 2H), 5.14 (dd, J = 8.0 Hz, 12.0 Hz, 2H), 5.53 (brs, 1H), 6.18 (brs, 1H), 7.02-7.12 (m, 5H), 7.13-7.20 (m, 2H), 7.23-7.36 (m, 7H); <sup>13</sup>C NMR (100 MHz, CDCl<sub>3</sub>) δ 21.40, 28.23, 53.41, 56.85, 67.16, 67.57, 79.59, 123.12, 126.92, 127.92, 128.20, 128.23, 128.33, 128.42, 128.51, 134.84, 134.94, 138.15, 139.15, 148.81, 149.96, 154.99, 166.83, 167.77; IR (neat)

$\nu$  3431, 1718, 1497, 1165; **HRMS**: calc'd for (M+H)<sup>+</sup> C<sub>30</sub>H<sub>34</sub>NO<sub>6</sub>: 504.2386; found 504.2383.

**(-)-6Cb** This product was obtained as a colorless oil in 99% yield and 97% ee from a reaction catalyzed by **Q-1d** (20 mol%) at -60 °C for 36 h.

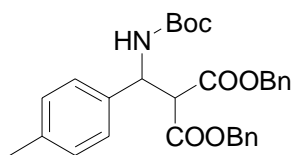

**6Db**

**(+)-6Db** This product was obtained as a colorless oil (92 mg) in 92% yield after flash chromatography (silica gel: Ethyl acetate / Hexane = 1 / 12) and in 97% ee as determined by HPLC [Regis Pirckle Covalent (*R, R*) Whelk-O 1, Hexane / IPA = 99 / 1, 0.5 ml·min<sup>-1</sup>,  $\lambda$  = 220nm,  $t_r$  (major) = 15.74 min,  $t_r$  (minor) = 18.03 min] from a reaction catalyzed by **QD-1d** at -60 °C for 36 h.

$[\alpha]_D^{25}$  = 14.0 ( $c$  = 0.98, CHCl<sub>3</sub>); **<sup>1</sup>H NMR** (400 MHz, CDCl<sub>3</sub>)  $\delta$  1.40 (s, 9H), 2.31 (s, 3H), 3.98 (s, 1H), 5.05 (s, 2H), 5.14 (dd,  $J$  = 8.0, 12.0 Hz, 2H), 5.51 (brs, 1H), 6.13 (brs, 1H), 7.02-7.17 (m, 7H), 7.22-7.36 (m, 7H), **<sup>13</sup>C NMR** (100 MHz, CDCl<sub>3</sub>)  $\delta$  21.02, 28.26, 53.24, 56.93, 67.20, 67.59, 79.61, 126.06, 128.02, 128.25, 128.35, 128.42, 128.53, 129.24, 134.87, 134.97, 136.23, 137.17, 154.99, 166.86, 167.81; **IR** (neat)  $\nu$  3430, 2977, 1719, 1498, 1161; **HRMS**: calc'd for (M+H)<sup>+</sup> C<sub>30</sub>H<sub>34</sub>NO<sub>6</sub>: 504.2386; found 504.2379.

**(-)-6Db** This product was obtained as a colorless oil in 96% yield and 92% ee from a reaction catalyzed by **Q-1d** (20 mol%) at -60 °C for 36 h.

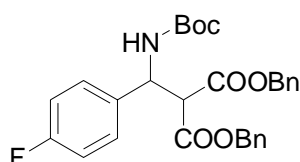

**6Eb**

**(+)-6Eb** This product was obtained as a white solid (102 mg) in 99% yield after flash chromatography (silica gel: Ethyl acetate / Hexane = 1 / 12) and in 98% ee as determined by HPLC [Daicel Chiralcel OD, Hexane / IPA = 90 : 10, 1.0 ml·min<sup>-1</sup>,  $\lambda$  = 220 nm,  $t_r$  (major) = 10.97 min,  $t_r$  (minor) = 8.09 min] from a reaction catalyzed by **QD-1d** at -60 °C for 36 h.

$[\alpha]_D^{25}$  = 20.3 ( $c$  = 1.15, CHCl<sub>3</sub>); **<sup>1</sup>H NMR** (400 MHz, CDCl<sub>3</sub>)  $\delta$  1.40 (s, 9H), 3.96 (s, 1H), 5.00-5.20 (m, 4H), 5.51 (brs, 1H), 6.18 (brs, 1H), 6.88-6.96 (m, 2H), 7.06-7.14 (m, 2H), 7.24-7.36 (m, 10H); **<sup>13</sup>C NMR** (100 MHz, CDCl<sub>3</sub>)  $\delta$  28.18, 52.87, 56.80, 67.29, 67.64, 79.80, 115.36 (d,  $J$  = 10.6 Hz), 127.87, 127.96, 128.04, 128.22, 128.34, 128.40, 128.44, 128.52, 134.70, 134.75 (d,  $J$  = 5.3 Hz), 154.87, 162.01 (d,  $J$  = 122.2Hz), 166.55, 167.62; **IR** (neat)  $\nu$  3428, 1720, 1226, 1159; **HRMS**: calc'd for (M+H)<sup>+</sup> C<sub>29</sub>H<sub>31</sub>NFO<sub>6</sub>: 508.2135; found 508.2120.

**(-)-6Eb** This product was obtained as a white solid in 98% yield and 94% ee from a reaction catalyzed by **Q-1d** (20mol%) at -60 °C for 36 h.

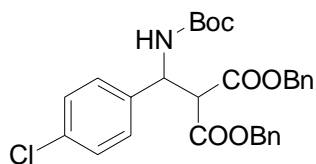

**6Fb**

**(+)-6Fb** This product was obtained as a white solid (103 mg) in 98% yield after flash chromatography (silica gel: Ethyl acetate / Hexane = 1/15) and in 99% ee as determined by HPLC [Daicel Chiralcel OD, Hexane / IPA = 90 / 10, 1.0 ml·min<sup>-1</sup>,  $\lambda$  = 220 nm,  $t_r$  (major) = 11.34 min,  $t_r$  (minor) = 8.08 min] from a reaction catalyzed by **QD-1d** at -60 °C for



36 h.  $[\alpha]_D^{25} = 21.0$  ( $c = 0.715$ ,  $\text{CHCl}_3$ );  $^1\text{H NMR}$  (400 MHz,  $\text{CDCl}_3$ )  $\delta$  1.40 (s, 9H), 3.95 (s, 1H), 5.05 (dd,  $J = 6.4, 12.0$  Hz, 2H), 5.14 (dd,  $J = 6.0, 12.4$  Hz, 2H), 5.50 (brs, 1H), 6.18 (brs, 1H), 7.05-7.12 (m, 2H), 7.15-7.24 (m, 2H), 7.24-7.35 (m, 8H);  $^{13}\text{C NMR}$  (100 MHz,  $\text{CDCl}_3$ )  $\delta$  28.22, 52.95, 56.64, 67.37, 67.74, 79.92, 127.64, 128.08, 128.27, 128.40, 128.46, 128.49, 128.57, 128.69, 133.40, 134.68, 134.79, 137.78, 154.90, 166.54, 167.61; **IR** (neat)  $\nu$  3369, 1721, 1493, 1367, 1251, 1161; **HRMS**: calc'd for  $(\text{M}+\text{H})^+$   $\text{C}_{29}\text{H}_{31}\text{NClO}_6$ : 524.1840; found 524.1832.

**(-)-6Fb** This product was obtained as a white solid in 97% yield and 91% ee from a reaction catalyzed by **Q-1d** (20 mol%) at  $-60$  °C for 36 h.

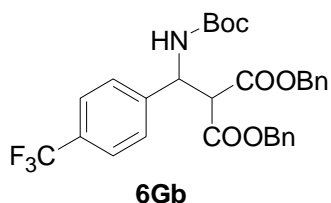

**(+)-6Gb** This product was obtained as a white solid (91 mg) in 81% yield after flash chromatography (silica gel: Ethyl acetate / Hexane = 1 / 12) and in 97% ee as determined by HPLC [Daicel Chiralcel OD, Hexane / IPA = 90 / 10, 1.0  $\text{ml}\cdot\text{min}^{-1}$ ,  $\lambda = 220$  nm,  $t_r$  (major) = 11.13 min,  $t_r$  (minor) = 8.13 min] from a reaction catalyzed by **QD-1d** at  $-60$  °C for 36 h.  $[\alpha]_D^{25} = 24.5$  ( $c = 1.05$ ,  $\text{CHCl}_3$ );  $^1\text{H NMR}$  (400 MHz,  $\text{CDCl}_3$ )  $\delta$  1.41 (s, 9H), 3.99 (s, 1H), 5.05 (dd,  $J = 7.2, 12$  Hz, 2H), 5.16 (dd,  $J = 7.2, 11.6$  Hz, 2H), 5.57 (brs, 1H), 6.27 (brs, 1H), 7.09 (d,  $J = 6.0$  Hz, 2H), 7.23-7.40 (m, 10H), 7.50(d,  $J = 7.2$  Hz, 2H);  $^{13}\text{C NMR}$  (100 MHz,  $\text{CDCl}_3$ )  $\delta$  28.21, 53.18, 56.42, 67.49, 67.86, 80.07, 125.51, 125.55, 126.65, 128.14, 128.31, 128.49, 128.52, 128.60, 129.80 (q,  $J = 32$  Hz), 134.59, 134.74, 139.91, 143.30, 154.93, 166.45, 167.57; **IR** (neat)  $\nu$  3383, 1754, 1736, 1687, 1517, 1327, 1296, 1162, 1124; **HRMS**: calc'd for  $(\text{M}+\text{H})^+$   $\text{C}_{30}\text{H}_{31}\text{NF}_3\text{O}_6$ : 558.2103; found 558.2096.

**(-)-6Gb** This product was obtained as a white solid in 82% yield and 93% ee from a reaction catalyzed by **Q-1d** (20 mol%) at  $-60$  °C for 36 h.

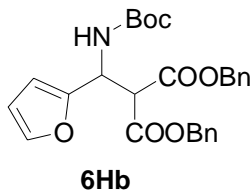

**(+)- 6Hb** This product was obtained as a colorless oil (96 mg) in 99% yield after flash chromatography (silica gel: Ethyl acetate / Hexane = 1 / 12) and in 97% ee as determined by HPLC [Daicel Chiralpak AD, Hexane / IPA = 90 / 10, 1.0  $\text{ml}\cdot\text{min}^{-1}$ ,  $\lambda = 220$  nm,  $t_r$  (major) = 16.36 min,  $t_r$  (minor) = 20.40 min] from a reaction catalyzed by **QD-1d** at  $-60$  °C for 36 h.  $[\alpha]_D^{25} = 5.9$  ( $c = 0.68$ ,  $\text{CHCl}_3$ );  $^1\text{H NMR}$  (400 MHz,  $\text{CDCl}_3$ )  $\delta$  1.41 (s, 9H), 4.18 (s, 1H), 5.04-5.20 (m, 4H), 5.60 (brs, 1H), 5.96 (d,  $J = 8.8$  Hz, 1H), 6.16-6.18 (m, 1H), 6.22-6.26 (m, 1H), 7.19-7.24 (m, 3H), 7.26-7.38(m, 8H);  $^{13}\text{C NMR}$  (100 MHz,  $\text{CDCl}_3$ )  $\delta$  28.19, 48.30, 54.24, 67.33, 67.63, 79.87, 106.77, 110.40, 128.13, 128.21, 128.30, 128.34, 128.46, 128.50, 134.88, 141.94, 152.00, 154.91, 166.53, 167.55; **IR** (neat)  $\nu$  3421, 1732, 1498, 1163; **HRMS**: calc'd for  $(\text{M}+\text{H})^+$   $\text{C}_{27}\text{H}_{30}\text{NO}_7$ : 480.2022; found 480.2019.

**(-)-6Hb** This product was obtained as a colorless oil in 99% yield and 96% ee from a reaction catalyzed by **Q-1d** (20 mol%) at  $-60$  °C for 36 h.

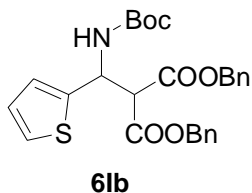

**(+)-6Ib** This product was obtained as a colorless oil (94 mg) in 95% yield after flash chromatography (silica gel: Ethyl acetate / Hexane = 1 / 20) and in 97% ee as determined by HPLC [Daicel Chiralcel OD, Hexane / IPA = 98 / 2, 1.0 ml·min<sup>-1</sup>, λ = 220 nm, t<sub>r</sub> (major) = 35.13 min, t<sub>r</sub> (minor) = 31.08 min] from a reaction catalyzed by QD-1d at -60 °C for 36 h. [α]<sub>D</sub><sup>25</sup> = 4.1 (*c* = 2.07, CHCl<sub>3</sub>); <sup>1</sup>H NMR (400 MHz, CDCl<sub>3</sub>) δ 1.42 (s, 9H), 4.08 (d, *J* = 4.0 Hz, 1H), 5.11 (s, 2H), 5.14 (dd, *J* = 6.8, 12 Hz, 2H), 5.76 (d, *J* = 4.4 Hz, 1H), 6.16 (d, *J* = 4.8 Hz, 1H), 6.80-6.88 (m, 2H), 7.18-7.22 (m, 3H), 7.25-7.40 (m, 8H); <sup>13</sup>C NMR (100 MHz, CDCl<sub>3</sub>) δ 28.51, 50.29, 57.03, 67.74, 68.05, 80.21, 124.71, 125.01, 127.16, 128.43, 128.56, 128.64, 128.70, 128.78, 128.84, 135.08, 135.12, 143.69, 155.14, 166.73, 167.92; IR (neat) ν 3424, 1719, 1496, 1163; HRMS: calc'd for (M+H)<sup>+</sup> C<sub>27</sub>H<sub>30</sub>NO<sub>6</sub>S: 496.1794; found 496.1785.

**(-)-6Ib** This product was obtained as a colorless oil in 96% yield and 88% ee from a reaction catalyzed by Q-1d (20 mol%) at -60 °C for 36 h.

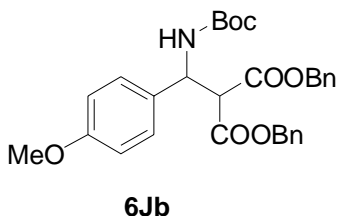

**(+)-6Jb** This product was obtained as a white solid (102 mg) in 98% yield after flash chromatography (silica gel: Ethyl acetate / Hexane = 1 / 6) and in 97% ee as determined by HPLC [Daicel Chiralcel OD, Hexane / IPA = 90 / 10, 1.0 ml·min<sup>-1</sup>, λ = 220 nm, t<sub>r</sub> (major) = 13.37 min, t<sub>r</sub> (minor) = 10.33 min] from a reaction catalyzed by QD-1d at -60 °C for 36 h. [α]<sub>D</sub><sup>25</sup> = 12.1 (*c* = 1.02, CHCl<sub>3</sub>); <sup>1</sup>H NMR (400 MHz, CDCl<sub>3</sub>) δ 1.40 (s, 9H), 3.77 (s, 3H), 3.96 (s, 1H), 5.06 (dd, *J* = 2.8, 12.0 Hz, 2H), 5.13 (dd, *J* = 5.6, 12.6 Hz, 2H), 5.48 (brs, 1H), 6.11 (brs, 1H), 6.78 (d, *J* = 8.8 Hz, 2H), 7.08-7.14 (m, 2H), 7.17 (d, *J* = 8.8 Hz, 2H), 7.24-7.36 (m, 8H); <sup>13</sup>C NMR (100 MHz, CDCl<sub>3</sub>) δ 28.25, 53.00, 55.17, 57.03, 67.21, 67.58, 79.63, 113.89, 127.38, 128.03, 128.24, 128.28, 128.36, 128.44, 128.53, 131.30, 134.87, 134.96, 154.96, 158.89, 166.81, 167.82; IR (neat) ν 3426, 1720, 1513, 1498, 1249, 1161; HRMS: calc'd for (M+H)<sup>+</sup> C<sub>30</sub>H<sub>34</sub>NO<sub>7</sub>: 520.2335; found 520.2338.

**(-)-6Jb** This product was obtained as a white solid in 97% yield and 93% ee from a reaction catalyzed by Q-1d (20 mol%) at -60 °C for 36 h.

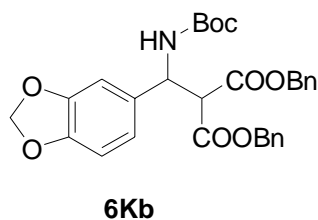

**(+)-6Kb** This product was obtained as a white solid (106 mg) in 99% yield after flash chromatography (silica gel: Ethyl acetate / Hexane = 1 / 7) and in 98% ee as determined by HPLC [Daicel Chiralcel OD, Hexane / IPA = 90 / 10, 1.0 ml·min<sup>-1</sup>, λ = 220 nm, t<sub>r</sub> (major) = 12.59 min, t<sub>r</sub> (minor) = 10.79 min] from a reaction catalyzed by QD-1d at -60 °C for 36 h. [α]<sub>D</sub><sup>25</sup> = 13.9 (*c* = 1.00, CHCl<sub>3</sub>); <sup>1</sup>H NMR (400 MHz, CDCl<sub>3</sub>) δ 1.40 (s, 9H), 3.94 (s, 1H), 5.02-5.22 (m, 4H), 5.44 (brs, 1H), 5.89 (s, 2H), 6.14 (brs, 1H), 6.62-6.72 (m, 4H), 6.75 (s, 1H), 7.10-7.16 (m, 2H), 7.22-7.36 (m, 7H); <sup>13</sup>C

**NMR** (100 MHz, CDCl<sub>3</sub>)  $\delta$  28.26, 53.22, 56.95, 67.20, 67.55, 79.66, 101.00, 106.83, 108.14, 119.48, 127.99, 128.17, 128.25, 128.32, 128.39, 128.48, 133.17, 134.78, 134.86, 146.88, 147.74, 154.85, 166.62, 167.69; **IR** (neat)  $\nu$  3423, 1720, 1490, 1240, 1164; **HRMS**: calc'd for (M+Na)<sup>+</sup> C<sub>30</sub>H<sub>31</sub>NO<sub>8</sub>Na: 556.1947; found 556.1927.

**(-)-6Kb** This product was obtained as a white solid in 99% yield and 94% ee from a reaction catalyzed by **Q-1d** (20 mol%) at -60 °C for 36 h.

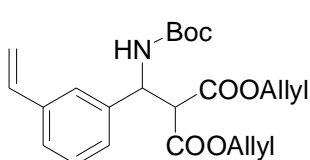

**6Lc**

**(+)-6Lc** This product was obtained as a colorless oil (80 mg) in 96% yield after flash chromatography (silica gel: Ethyl acetate / Hexane = 1 / 7) and in 96% ee as determined by HPLC [Daicel Chiralpak AS, Hexane / IPA = 98 / 2, 1.0 ml·min<sup>-1</sup>,  $\lambda$  = 220 nm,  $t_r$  (major) = 13.54 min,  $t_r$  (minor) = 11.52 min] from a reaction catalyzed by **QD-1d** at -60 °C for 36 h.  $[\alpha]_D^{25}$  = 10.1 ( $c$  = 0.85, CHCl<sub>3</sub>); **<sup>1</sup>H NMR** (400 MHz, CDCl<sub>3</sub>)  $\delta$  1.40 (s, 9H), 3.96 (s, 1H), 4.44-4.72 (m, 4H), 5.10-5.36 (m, 4H), 5.51 (brs, 1H), 5.66-5.80 (m, 2H), 5.82-5.94 (m, 1H), 6.20 (brs, 1H), 6.68 (dd,  $J$  = 6.8, 11.2 Hz, 1H), 7.19 (d,  $J$  = 6.8 Hz, 1H), 7.24-7.34 (m, 4H); **<sup>13</sup>C NMR** (100 MHz, CDCl<sub>3</sub>)  $\delta$  28.25, 53.36, 56.79, 66.14, 66.49, 79.72, 114.29, 118.80, 119.00, 124.27, 125.41, 125.66, 128.76, 131.05, 131.21, 136.52, 137.84, 139.67, 154.97, 166.66, 167.61; **IR** (neat)  $\nu$  3430, 1721, 1497, 1165; **HRMS**: calc'd for (M+H)<sup>+</sup> C<sub>23</sub>H<sub>29</sub>NO<sub>6</sub>Na: 438.1893; found 438.1885.

**(-)-6Lc** This product was obtained as a white solid in 99% yield and 95% ee from a reaction catalyzed by **Q-1d** (20 mol%) at -60 °C for 36 h.

## 5. General Procedure for Enantioselective Mannich Reaction of Malonate **5** to Alkyl Imine **4**

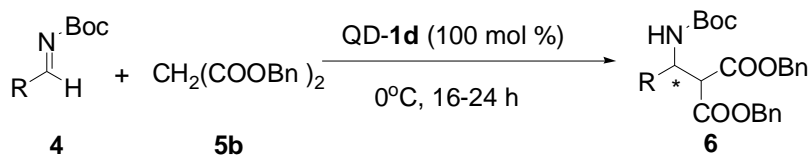

To a solution of malonate **5b** (0.10 mmol) and **QD-1d** (100 mol%) in dichloromethane (0.30 mL) at 0 °C, was added imine **4** (0.15 mmol) in one portion. The resulting mixture was kept at 0 °C for 16-24 h. Reaction mixture was purified by silica gel flash chromatography using the solvent specified below.

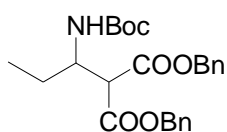

**(+)-6Mb** This product was obtained as a colorless oil (27 mg) in 63% yield after flash chromatography (silica gel: Ethyl ether / methylene chloride = 1 / 150) and in 89% ee as determined by HPLC [Daicel Chiralcel OD, Hexane / IPA = 98 / 2, 1.0 ml·min<sup>-1</sup>,  $\lambda$  = 220 nm,  $t_r$  (major) = 18.70 min,  $t_r$  (minor) = 16.15 min] from a reaction catalyzed by **QD-1d** (100 mol%) at 0 °C for 20 h. Catalyst **QD-1d** (57 mg, 95%) was recycled.  $[\alpha]_D^{25}$  = 29.2 ( $c$  = 1.01, CHCl<sub>3</sub>); **<sup>1</sup>H NMR** (400 MHz, CDCl<sub>3</sub>)  $\delta$  0.89 (t,  $J$  = 7.2 Hz, 1H), 1.39 (s, 9H), 1.44-

1.58 (m, 2H), 3.70 (d,  $J = 4.0$  Hz, 1H), 4.15-4.22 (m, 1H), 5.04-5.16 (m, 4H), 5.33 (d,  $J = 9.6$  Hz, 1H), 7.24-7.34 (m, 10H);  $^{13}\text{C}$  NMR (100 MHz,  $\text{CDCl}_3$ )  $\delta$  10.80, 26.64, 28.29, 51.81, 54.78, 67.21, 67.45, 79.25, 128.22, 128.29, 128.34, 128.54, 128.57, 135.07, 155.45, 167.70, 168.11; IR (neat)  $\nu$  3434, 2963, 1733, 1711, 1500, 1162; HRMS: calc'd for  $(\text{M}+\text{Na})^+$   $\text{C}_{25}\text{H}_{31}\text{NO}_6\text{Na}$ : 464.2049; found 464.2049.

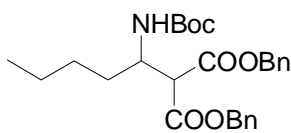

**(+)-6Nb** This product was obtained as a colorless oil (30 mg) in 64% yield after flash chromatography (silica gel: Hexanes / methylene chloride = 1 / 2) and in 92% ee as determined by HPLC [Daicel Chiralcel OD, Hexane / IPA = 98 / 2, 1.0  $\text{ml}\cdot\text{min}^{-1}$ ,  $\lambda = 220$  nm,  $t_r$  (major) = 16.23 min,  $t_r$  (minor) = 14.31 min] from a reaction with catalyzed by QD-1d (100 mol%) at 0 °C for 24 h. Catalyst QD-1d (59 mg, 98%).  $[\alpha]_{\text{D}}^{25} = 42.5$  ( $c = 1.00$ ,  $\text{CHCl}_3$ );  $^1\text{H}$  NMR (400 MHz,  $\text{CDCl}_3$ )  $\delta$  0.84 (t,  $J = 6.8$  Hz, 3H), 1.20-1.38 (m, 4H), 1.41 (s, 9H), 1.45-1.58 (m, 2H), 3.71 (d,  $J = 3.6$  Hz, 1H), 4.22-4.30 (m, 1H), 5.06-5.20 (m, 4H), 5.33 (d,  $J = 9.6$  Hz, 1H), 7.33 (s, 10H);  $^{13}\text{C}$  NMR (100 MHz,  $\text{CDCl}_3$ )  $\delta$  13.91, 22.30, 28.30, 28.42, 33.20, 50.39, 55.05, 67.20, 67.43, 79.26, 128.29, 128.35, 128.44, 128.55, 128.57, 135.15, 155.36, 167.71, 168.12; IR (neat)  $\nu$  3424, 1733, 1716, 1496, 1162; HRMS: calc'd for  $(\text{M}+\text{Na})^+$   $\text{C}_{27}\text{H}_{35}\text{NO}_6\text{Na}$ : 492.2362; found 492.2359.

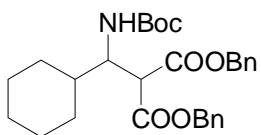

**(+)-6Ob** This product was obtained as a colorless oil (55 mg) in 55% yield after flash chromatography (silica gel: Ethyl acetate / methylene chloride = 1 / 300) and in 88% ee as determined by HPLC [Daicel Chiralcel OD, Hexane / IPA = 97 / 3, 1.0  $\text{ml}\cdot\text{min}^{-1}$ ,  $\lambda = 220$  nm,  $t_r$  (major) = 10.28 min,  $t_r$  (minor) = 8.25 min] from a reaction with 4O (0.30 mmol) and 5b (0.20 mmol) in dichloromethane (600  $\mu\text{l}$ ) catalyzed by QD-1d (100 mol%) at 0 °C for 16 h. Catalyst QD-1d (117 mg, 98%) was recycled.  $[\alpha]_{\text{D}}^{25} = 41.3$  ( $c = 1.01$ ,  $\text{CHCl}_3$ );  $^1\text{H}$  NMR (400 MHz,  $\text{CDCl}_3$ )  $\delta$  0.84-1.14 (m, 4H), 1.41 (s, 9H), 1.48-1.86 (m, 6H), 3.81 (d,  $J = 4.0$  Hz, 1H), 4.07 (dt,  $J = 3.6, 14.4$  Hz, 1H), 5.13 (dd,  $J = 12.0, 80.0$  Hz, 2H), 5.16 (dd,  $J = 6.0, 12.0$  Hz, 2H), 5.55 (d,  $J = 11.2$  Hz, 1H), 7.28-7.40 (m, 10H);  $^{13}\text{C}$  NMR (100 MHz,  $\text{CDCl}_3$ )  $\delta$  25.82, 25.86, 25.99, 28.32, 29.52, 30.13, 41.16, 52.81, 55.22, 67.19, 67.61, 79.06, 128.30, 128.36, 128.46, 128.55, 128.60, 135.12, 155.61, 168.21, 168.55; IR (neat)  $\nu$  3434, 2923, 1728, 1713, 1496, 1160; HRMS: calc'd for  $(\text{M}+\text{Na})^+$   $\text{C}_{29}\text{H}_{37}\text{NO}_6\text{Na}$ : 518.2519; found 518.2514.

## 6. Conversion of *N*-Boc amine **6Ab** to *N*-Boc-protected $\beta$ -amino acid **7Ab**

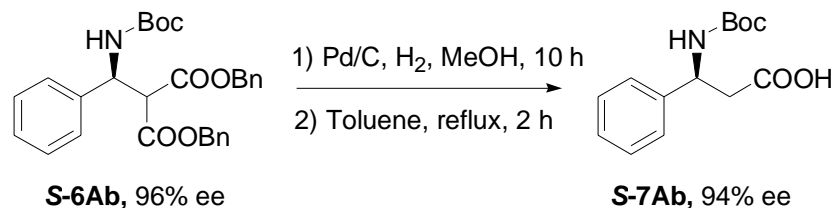

*N*-Boc amine **6Ab** (48.9 mg, 0.10 mmol) was hydrogenated with 10% palladium on carbon (21 mg) in methanol (3.0 mL) at room temperature under an atmosphere of hydrogen for 10 h. The mixture was filtered with celite to remove insoluble material after which the filtrate was concentrated to give a foam. This was dissolved in toluene (4.0 mL) and the solution was heated at reflux for 2 h. The solvent was removed and the product was purified by flash chromatography.

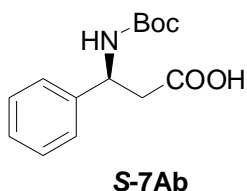

**S-7Ab** This product was obtained as white solid (20 mg) in 76% yield after flash chromatography (silica gel: Hexanes : Ethyl Acetate : Acetic Acid = 80 : 20 : 1) and in 94% ee as determined by HPLC [Daicel Chiralcel OD, Hexane / IPA / TFA = 98 / 2 / 0.5, 1.0ml·min<sup>-1</sup>,  $\lambda$  = 220 nm, 0 °C,  $t_r$  (major) = 14.00 min,  $t_r$  (minor) = 18.17 min].  $[\alpha]_D^{25}$  = -50.1 ( $c$  = 0.71, MeOH); Spectrum data was same as reported and the absolute configure of **7ab** was determined to be *S* by comparing the optical rotation with literature value  $[\alpha]_D^{22}$  = -45.6 ( $c$  = 1.00, MeOH)<sup>8</sup>.

## 7. Conversion of *N*-Boc amine **6Lc** to *N*-Boc-protected $\beta$ -amino acid **7Lc**

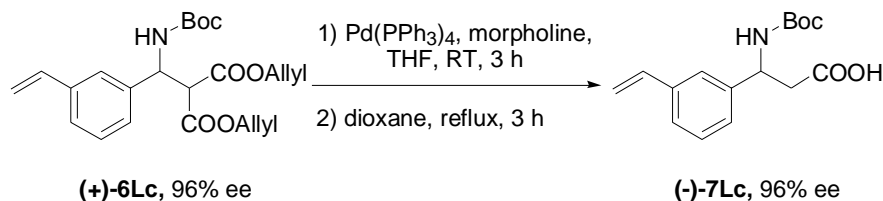

To a suspension of **6Lc** (56.0 mg, 0.135 mmol) and tetrakis(triphenylphosphine)-palladium (15.6 mg 0.0135mmol) in THF (1.5 mL) was added morpholine (36  $\mu$ l, 0.41 mmol), the resulting reaction mixture was stirred at room temperature for 3 h. Then solvent was removed under reduced pressure, and the residue was dissolved in dioxane (3.0 mL) and refluxed for 3 h. Solvent was removed under reduced pressure and the residue was purified by flash chromatography.

<sup>8</sup> Laschat, S.; Kunz, H. *J. Org. Chem.*, **1991**, *56*, 5883

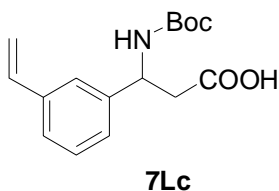

**(-)-7Lc** This product was obtained as white foam (28 mg) in 72% yield after flash chromatography (silica gel: Hexanes : Ethyl Acetate : Acetic Acid = 88 : 11 : 1) and in 96% ee as determined by HPLC [Daicel Chiralcel OD, Hexane / IPA / TFA = 98 / 2 / 0.5, 1.0 ml·min<sup>-1</sup>, λ = 220 nm, t<sub>r</sub> (major) = 32.76 min, t<sub>r</sub> (minor) = 38.20 min]. [α]<sub>D</sub><sup>25</sup> = -23.0 (c = 1.10, CH<sub>3</sub>Cl); <sup>1</sup>H NMR (400 MHz, CDCl<sub>3</sub>) δ 1.41 (s, 9H), 2.85 (brs, 2H), 5.11 (br, 1H), 5.25 (dd, J = 2.4, 10.8 Hz, 1H), 5.46 (br, 1H), 5.74 (dd, J = 2.4, 17.6 Hz, 1H), 6.70 (ddd, J = 2.4, 11.2, 17.2 Hz, 1H), 7.16-7.22 (m, 1H), 7.26-7.36 (m, 3H), 10.6 (br, 1H); <sup>13</sup>C NMR (100 MHz, CD<sub>3</sub>OD) δ 28.83, 42.34, 52.94, 80.40, 114.36, 125.37, 126.27, 126.97, 129.84, 138.20, 139.32, 144.22, 157.64, 174.42; IR (neat) ν 2979, 1714, 1395, 1164; HRMS: calc'd for (M+H)<sup>+</sup> C<sub>16</sub>H<sub>22</sub>NO<sub>4</sub>: 292.1549; found 292.1555.

## 8. General Procedure for Enantioselective Mannich Reaction of Allyl β-ketoester **8** to imine **4A**, and transformation of Mannich adduct **9** to amino ketone **10**.

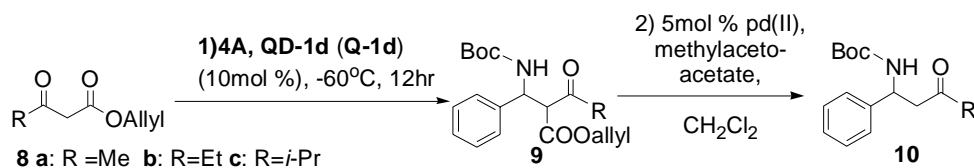

To a solution of imine **4A** (0.20 mmol) and chiral catalyst (10 mol%) in acetone (0.40 ml) at -60 °C, was added β-ketoester **8** (0.30 mmol) in one portion. The resulting mixture was kept at -60 °C for 12 h. The reaction mixture was diluted with ethyl ether (5 ml) and allowed to pass through a short silica gel column. Then the filtrate was concentrated and purified by silica gel flash chromatography using the eluent specified below.

Mannich adduct **9** was converted to **10** by Pd-promoted decarboxylation<sup>9</sup>.

To an oven dried round bottom flask (10 mL), was added allyl palladium chloride dimer (1.8mg, 0.005 mmol) and (±) 2,3-O-Isopropylidene-2,3-dihydroxy-1,4-bis(diphenylphosphino) butane ((±) DIOP) (5.0 mg, 0.010 mmol). The Pd catalyst and ligand were dissolved in methylene chloride (250 μl) and stirred at room temperature for 10 minutes. Methyl acetoacetate (0.023 mL, 0.20 mmol) and isolated product (**9Aa** – **9Ac**, 0.10 mmol) were added successively. The reaction solution was stirred at room temperature overnight and then subjected directly to flash chromatography over silica gel using the eluent specified below.

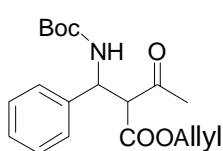

**9Aa** This product was obtained as a white solid (61 mg) in 90% yield after flash chromatography (silica gel: Ethyl acetate / Hexane = 1/8) from a reaction catalyzed by QD-1d (10 mol%) at -60 °C for 12 h. <sup>1</sup>H NMR (400 MHz, CDCl<sub>3</sub>, major diastereomer was reported) δ 1.40 (s,

<sup>9</sup> Lou S.; Taoka, B. M.; Ting, A.; Schaus, S. E. *J. Am. Chem. Soc.* **2005**, *127*, 11256

9H), 2.17 (s, 3H), 4.04 (d,  $J = 6.0$  Hz, 1H), 4.56 (d,  $J = 5.2$  Hz, 2H), 5.18-5.28 (m, 2H), 5.45 (brs, 1H), 5.70-5.90 (m, 2H), 7.20-7.40 (m, 5H); **HRMS**: calc'd for (M+H)<sup>+</sup> C<sub>19</sub>H<sub>26</sub>NO<sub>5</sub>: 348.1811; found 348.1810.

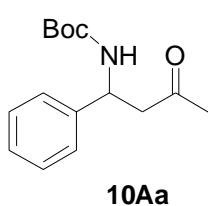

**(-)-10Aa** This product was obtained as a white solid (22 mg) in 83% yield after flash chromatography (silica gel: Ethyl acetate / Hexane = 1 / 3) and in 92% ee as determined by HPLC [Regis Pirckle Covalent (*R, R*) Whelk-O 1, Hexane / IPA = 85 / 15, 1.0 ml·min<sup>-1</sup>,  $\lambda = 220$  nm,  $t_r$  (major) = 5.98 min,  $t_r$  (minor) = 7.80 min].  $[\alpha]_D^{25} = -24.7$  ( $c = 0.55$ , CHCl<sub>3</sub>); **<sup>1</sup>H NMR** (400 MHz, CDCl<sub>3</sub>)  $\delta$  1.41 (s, 9H), 2.09 (s, 3H), 2.91 (dd,  $J = 5.6, 16.0$  Hz, 1H), 2.9-3.1 (m, 1H), 5.08 (brs, 1H), 5.41 (brs, 1H), 7.20-7.40 (m, 5H); **<sup>13</sup>C NMR** (100 MHz, CDCl<sub>3</sub>)  $\delta$  28.31, 30.59, 49.30, 51.02, 79.68, 126.19, 127.42, 128.63, 141.50, 155.10, 206.98; **IR** (neat)  $\nu$  3384, 1714, 1685, 1516, 1168; **HRMS**: calc'd for (M+H)<sup>+</sup> C<sub>15</sub>H<sub>22</sub>NO<sub>3</sub>: 264.1600; found 264.1604.

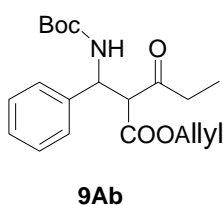

**9Ab** This product was obtained as a white solid (57 mg) in 79% yield after flash chromatography (silica gel: Ethyl acetate / Hexane = 1 / 10) from a reaction catalyzed by QD-1d (10 mol %) at -60 °C for 12 h. **<sup>1</sup>H NMR** (400 MHz, CDCl<sub>3</sub>, both diastereomers were reported)  $\delta$  0.93 (t,  $J = 6.8$  Hz, 3H), 1.08 (t,  $J = 6.8$  Hz, 3H), 1.40 (s, 9H), 1.41 (s, 9H), 1.56 (s, 2H), 2.12-2.22 (m, 1H), 2.55-2.63 (m, 2H), 2.75 (m, 1H), 4.06 (m, 2H), 4.52-4.58 (m, 4H), 5.12-5.28 (m, 2H), 5.44 (brs, 1H), 5.53 (brs, 1H), 5.71-5.83 (m, 2H), 5.99 (brs, 1H), 6.19 (brs, 1H), 7.24-7.35 (m, 10H); **HRMS**: calc'd for (M+Na)<sup>+</sup> C<sub>20</sub>H<sub>27</sub>NO<sub>5</sub>Na: 384.1787; found 384.1776.

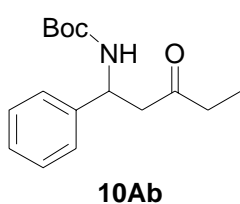

**(-)-10Ab** This product was obtained as a white solid in 81% yield after flash chromatography (silica gel: Ethyl acetate / Hexane = 1 / 15-1 / 5) and in 91% ee as determined by HPLC [Regis Pirckle Covalent (*R, R*) Whelk-O 1, Hexane / IPA = 85 / 15, 1.0 ml·min<sup>-1</sup>,  $\lambda = 220$  nm,  $t_r$  (major) = 5.41 min,  $t_r$  (minor) = 7.53 min].  $[\alpha]_D^{25} = -19.5$  ( $c = 0.57$ , CHCl<sub>3</sub>); **<sup>1</sup>H NMR** (400 MHz, CDCl<sub>3</sub>)  $\delta$  0.96 (t,  $J = 6.8$  Hz, 3H), 1.41 (s, 9H), 2.25-2.43 (m, 2H), 2.88 (dd,  $J = 6.0, 15.6$  Hz, 1H), 2.99-3.02 (m, 1H), 5.08 (s, 1H), 5.52 (s, 1H), 7.22-7.34 (m, 5H); **<sup>13</sup>C NMR** (100 MHz, CDCl<sub>3</sub>)  $\delta$  7.35, 28.29, 36.63, 48.04, 51.14, 79.59, 126.12, 127.30, 128.58, 141.62, 155.09, 209.73; **IR** (neat)  $\nu$  3380, 1715, 1684, 1519; **HRMS**: calc'd for (M+H)<sup>+</sup> C<sub>16</sub>H<sub>24</sub>NO<sub>3</sub>: 278.1756; found 278.1745.

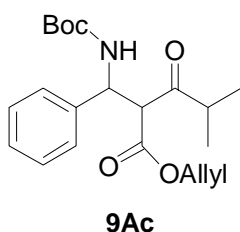

**QD-9Ac** This product was obtained as a white solid (58.6 mg) in 78% yield after flash chromatography (silica gel: Ethyl acetate / Hexane = 1 / 10) from a reaction catalyzed by QD-1d (10 mol %) at -60 °C for 12 h. **<sup>1</sup>H NMR** (400 MHz, CDCl<sub>3</sub>, both diastereomers were reported)  $\delta$  0.67 (d,  $J = 6.8$  Hz, 3H), 0.97 (d,  $J = 6.4$  Hz, 3H), 1.08 (m, 3H), 1.19 (d,  $J = 6.4$  Hz, 3H), 1.41 (s, 18 H), 1.58 (s, 2H), 2.40-2.47 (m, 1H), 2.96 (brs, 1H), 4.20-4.23 (m, 2H), 4.52-4.53 (m,

2H), 4.58-4.67 (m, 2H), 5.12-5.17 (m, 2H), 5.24-5.34 (m, 2H), 5.48 (brs, 2H), 5.71-5.78 (m, 1H), 5.84-5.91 (m, 1H), 6.16 (brs, 1H), 6.40 (brs, 1H), 7.22-7.34 (m, 10H); **HRMS**: calc'd for (M+Na)<sup>+</sup> C<sub>21</sub>H<sub>29</sub>NO<sub>5</sub>Na: 398.1943; found 398.1932.

**Q-9Ac** This product was obtained as a white solid in 85% yield from a reaction catalyzed by **Q-1d** (10 mol%) at -60 °C for 12 h.

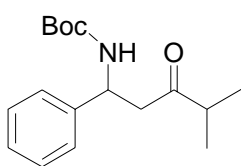

**10Ac**

**(-)-10Ac** This product was obtained as a white solid in 66% yield from **QD-9Ac**, after flash chromatography (silica gel: Ethyl acetate / Hexane = 1/15) and in 96% ee as determined by HPLC [Daicel Chiralpak AS, Hexane / IPA = 98 : 2, 1.0 ml·min<sup>-1</sup>, λ = 220 nm, t<sub>r</sub> (major) = 11.76 min, t<sub>r</sub> (minor) = 10.54 min]. [α]<sub>D</sub><sup>25</sup> = -15.0 (c = 0.92, CHCl<sub>3</sub>); **<sup>1</sup>H NMR** (400 MHz, CDCl<sub>3</sub>) δ 0.95 (d, J = 7.2 Hz, 3H), 0.99 (d, J = 6.4 Hz, 3H), 1.41 (s, 9H), 2.44-2.51 (m, 1H), 2.91 (dd, J = 6.0, 16.4 Hz, 1H), 3.06-3.10 (m, 1H), 5.08 (brs, 1H), 5.63 (brs, 1H), 7.21-7.33 (m, 5H); **<sup>13</sup>C NMR** (100 MHz, CD<sub>4</sub>OD) δ 18.14, 28.74, 42.15, 48.09, 52.09, 80.20, 127.41, 128.15, 129.45, 144.19, 157.51, 213.91; **IR** (neat) ν 3375, 1711, 1686, 1520; **HRMS**: calc'd for (M+Na)<sup>+</sup> C<sub>17</sub>H<sub>25</sub>NO<sub>3</sub>Na: 314.1732; found 314.1727.

**(+)-10Ac** This product was obtained as a white solid in 99% yield and 92% ee from **Q-9Ac**.



HPLC Condition: Daicel Chiralpak AD, Hexane / IPA = 90 / 10, 1.0 ml·min<sup>-1</sup>, 220 nm

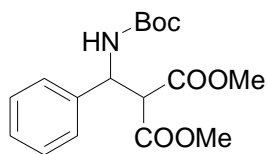

racemic **6Aa**

(-)-**6Aa**, 93% ee  
Product of Q-**1d** catalyzed  
reaction

(+)-**6Aa**, 97% ee  
Product of QD-**1d** catalyzed  
reaction

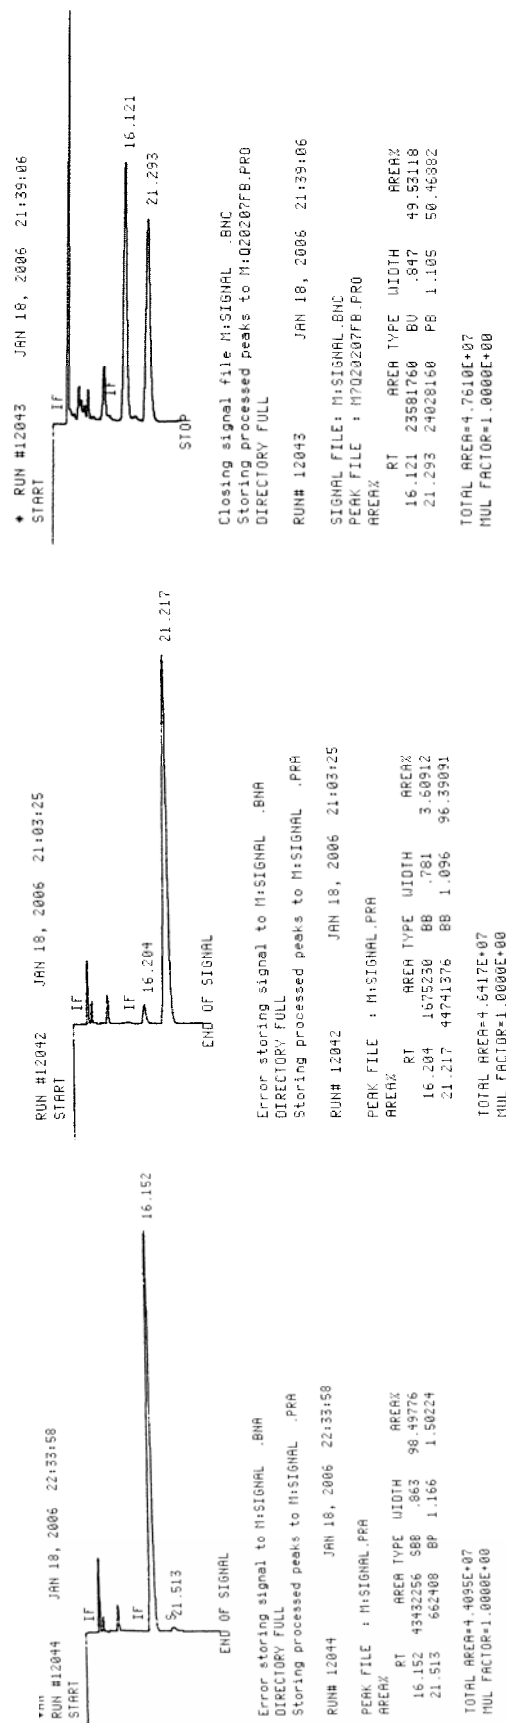

HPLC Condition: Regis Pirckle Covalent (*R, R*) Whelk-O 1, Hexane / IPA = 99 / 1,  
1.0 ml·min<sup>-1</sup>, 220 nm

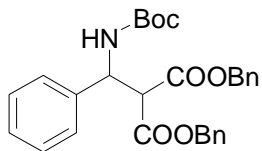

racemic **6Ab**

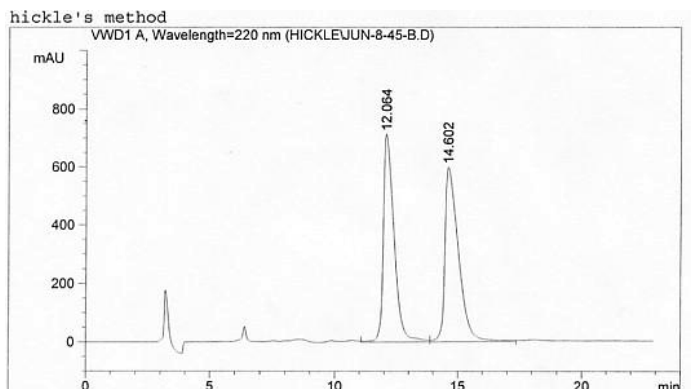

Signal 1: VWD1 A, Wavelength=220 nm

| Peak #   | RetTime [min] | Sig | Type | Area mAU  | *s | Height [mAU] | Area %  |
|----------|---------------|-----|------|-----------|----|--------------|---------|
| 1        | 12.064        | 1   | VV   | 2.16518e4 |    | 712.11652    | 48.5263 |
| 2        | 14.602        | 1   | VB   | 2.29669e4 |    | 596.88727    | 51.4737 |
| Totals : |               |     |      | 4.46186e4 |    | 1309.00378   |         |

(-)-**6Ab**, 94% ee  
Product of Q-**1d** catalyzed  
reaction

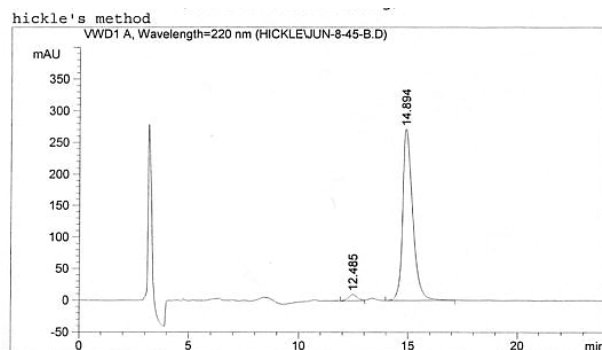

Signal 1: VWD1 A, Wavelength=220 nm

| Peak #   | RetTime [min] | Sig | Type | Area mAU   | *s | Height [mAU] | Area %  |
|----------|---------------|-----|------|------------|----|--------------|---------|
| 1        | 12.485        | 1   | BV   | 278.17789  |    | 9.92384      | 3.0802  |
| 2        | 14.894        | 1   | VB   | 8752.93164 |    | 271.07489    | 96.9198 |
| Totals : |               |     |      | 9031.10953 |    | 280.99873    |         |

(+)-**6Ab**, 96% ee  
Product of QD-**1d** catalyzed  
reaction

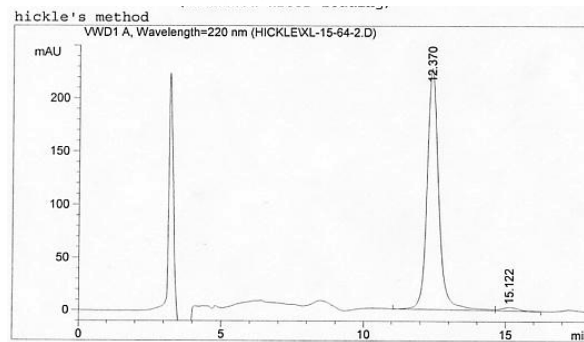

Signal 1: VWD1 A, Wavelength=220 nm

| Peak #   | RetTime [min] | Sig | Type | Area mAU   | *s | Height [mAU] | Area %  |
|----------|---------------|-----|------|------------|----|--------------|---------|
| 1        | 12.370        | 1   | VB   | 6460.62549 |    | 227.44182    | 97.9679 |
| 2        | 15.122        | 1   | BB   | 134.01273  |    | 3.34240      | 2.0321  |
| Totals : |               |     |      | 6594.63821 |    | 230.78422    |         |

HPLC Condition: Daicel Chiralpak AS, Hexane / IPA = 98 / 2, 1.0 ml·min<sup>-1</sup>, 220 nm

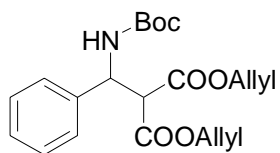

racemic **6Ac**

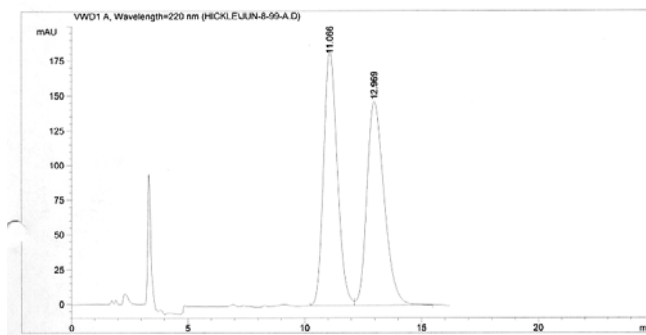

Signal 1: VWD1 A, Wavelength=220 nm

| Peak #   | RetTime [min] | Type | Width [min] | Area mAU *s | Height [mAU] | Area %  |
|----------|---------------|------|-------------|-------------|--------------|---------|
| 1        | 11.066        | BV   | 0.6409      | 7473.46240  | 182.46924    | 49.7056 |
| 2        | 12.969        | VB   | 0.8013      | 7562.00244  | 146.23720    | 50.2944 |
| Totals : |               |      |             | 1.50355e4   | 328.70644    |         |

(-)-**6Ac**, 92% ee  
Product of Q-**1d** catalyzed  
reaction

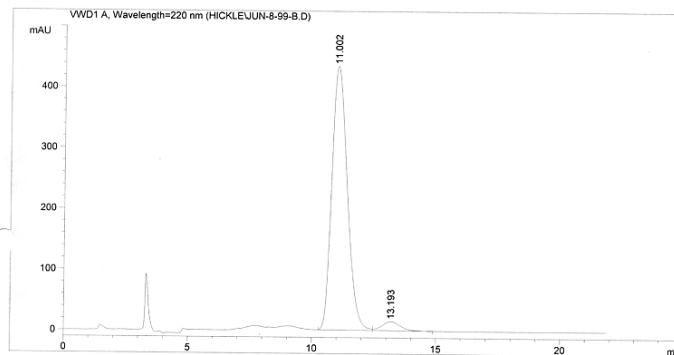

Signal 1: VWD1 A, Wavelength=220 nm

| Peak #   | RetTime [min] | Type | Width [min] | Area mAU *s | Height [mAU] | Area %  |
|----------|---------------|------|-------------|-------------|--------------|---------|
| 1        | 11.002        | BV   | 0.6828      | 1.88573e4   | 433.04745    | 96.0464 |
| 2        | 13.193        | VB   | 0.8066      | 776.23462   | 14.88056     | 3.9536  |
| Totals : |               |      |             | 1.96335e4   | 447.92801    |         |

(+)-**6Ac**, 98% ee  
Product of QD-**1d** catalyzed  
reaction

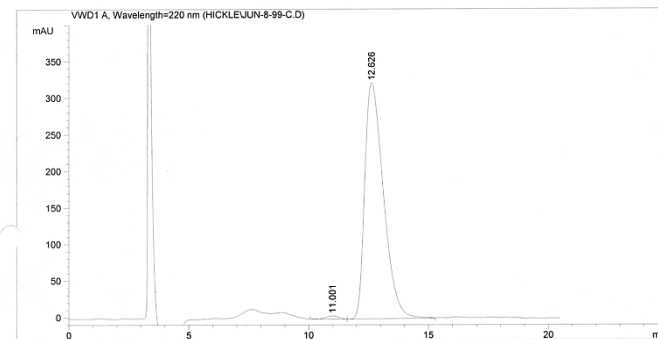

Signal 1: VWD1 A, Wavelength=220 nm

| Peak #   | RetTime [min] | Type | Width [min] | Area mAU *s | Height [mAU] | Area %  |
|----------|---------------|------|-------------|-------------|--------------|---------|
| 1        | 11.001        | BV   | 0.5889      | 158.93767   | 4.47746      | 0.9018  |
| 2        | 12.626        | VB   | 0.8421      | 1.74660e4   | 322.19614    | 99.0982 |
| Totals : |               |      |             | 1.76249e4   | 326.67359    |         |

HPLC Condition: Daicel Chiralpak AS, Hexane / IPA = 90 / 10, 1.0 ml·min<sup>-1</sup>, 220nm

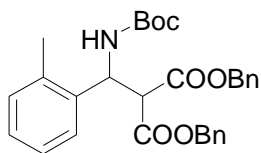

racemic **6Bb**

(-)-**6Bb**, 95% ee  
Product of Q-1d catalyzed  
reaction

(+)-**6Bb**, 99% ee  
Product of QD-1d catalyzed  
reaction

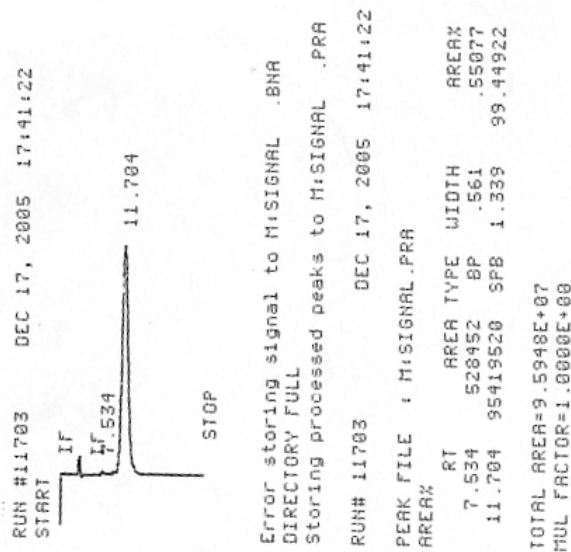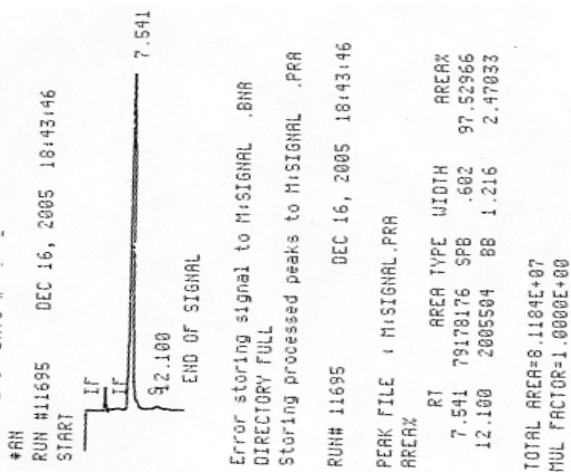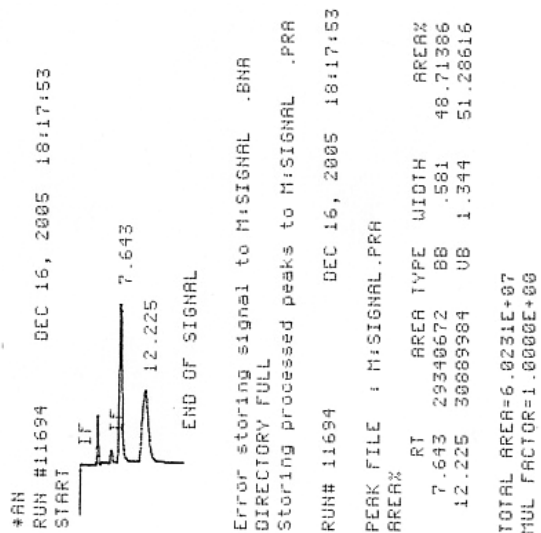

HPLC Condition: Daicel Chiralcel OD, Hexane / IPA = 90 / 10, 0.5 ml·min<sup>-1</sup>, 220 nm

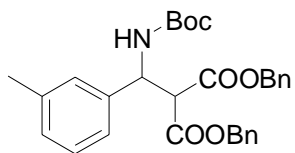

racemic **6Cb**

(-)-**6Cb**, 97% ee  
Product of Q-**1d** catalyzed  
reaction

(+)-**6Cb**, 98% ee  
Product of QD-**1d** catalyzed  
reaction

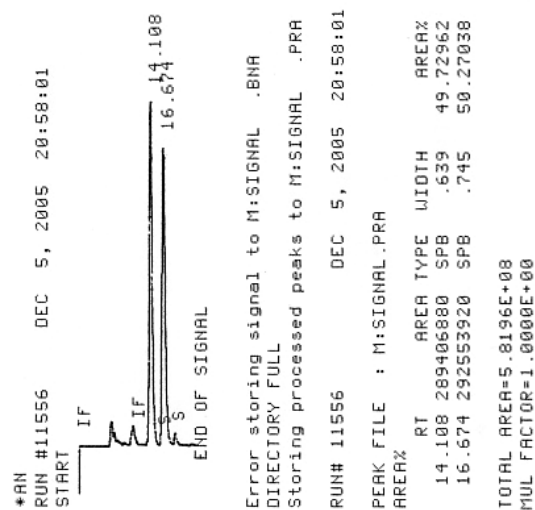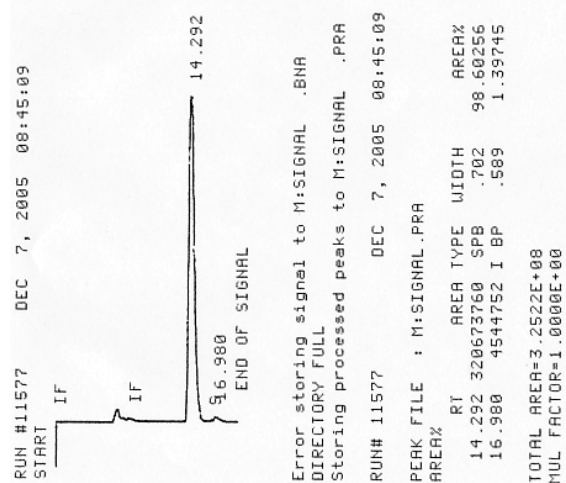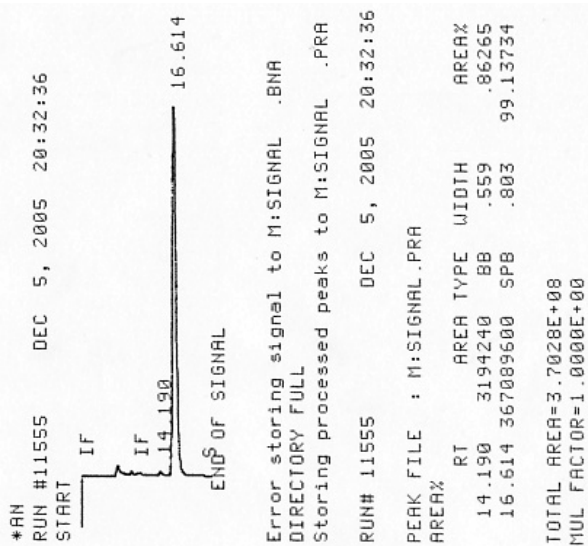

HPLC Condition: Regis Pirckle Covalent (*R,R*) Whelk-O 1, Hexane / IPA = 99 / 1,  
0.5 ml·min<sup>-1</sup>, 220 nm

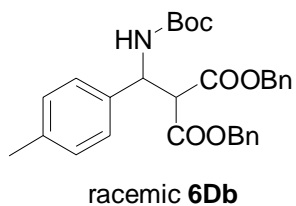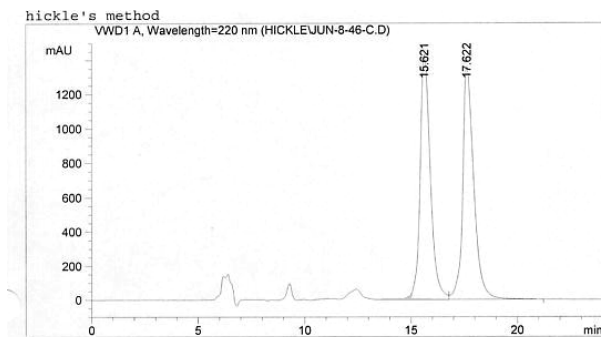

Signal 1: VWD1 A, Wavelength=220 nm

| Peak # | RetTime [min] | Sig | Type | Area mAU *s | Height [mAU] | Area %  |
|--------|---------------|-----|------|-------------|--------------|---------|
| 1      | 15.621        | 1   | BV   | 4.82044e4   | 1429.71765   | 49.2814 |
| 2      | 17.622        | 1   | VB   | 4.96102e4   | 1359.73657   | 50.7186 |

(-)-**6Db**, 92% ee  
Product of Q-1d catalyzed  
reaction

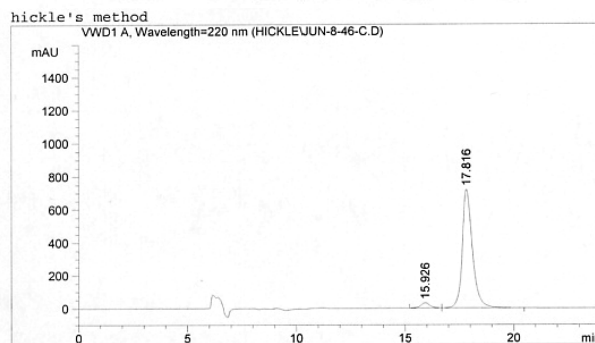

Signal 1: VWD1 A, Wavelength=220 nm

| Peak # | RetTime [min] | Sig | Type | Area mAU *s | Height [mAU] | Area %  |
|--------|---------------|-----|------|-------------|--------------|---------|
| 1      | 15.926        | 1   | BV   | 977.26251   | 32.62965     | 3.9814  |
| 2      | 17.816        | 1   | VB   | 2.35686e4   | 719.15088    | 96.0186 |

Totals : 2.45459e4 751.78053

(+)-**6Db**, 97% ee  
Product of QD-1d catalyzed  
reaction

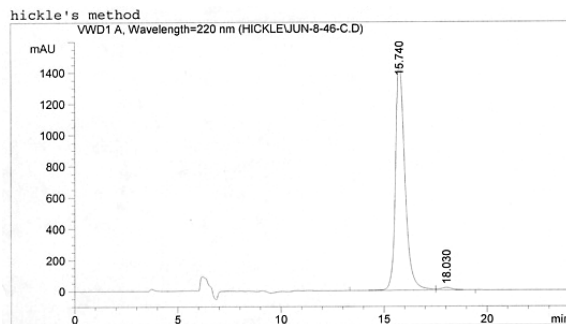

Signal 1: VWD1 A, Wavelength=220 nm

| Peak # | RetTime [min] | Sig | Type | Area mAU *s | Height [mAU] | Area %  |
|--------|---------------|-----|------|-------------|--------------|---------|
| 1      | 15.740        | 1   | BV   | 4.68023e4   | 1447.52808   | 98.4714 |
| 2      | 18.030        | 1   | VB   | 726.52606   | 16.99037     | 1.5286  |

Totals : 4.75288e4 1464.51845

HPLC Condition: Daicel Chiralcel OD, Hexane / IPA = 90 / 10, 1.0 ml·min<sup>-1</sup>, 220 nm

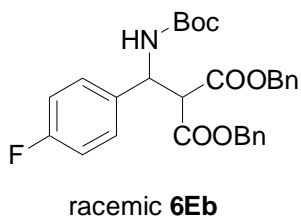

(-)-**6Eb**, 94% ee  
Product of Q-1d catalyzed  
reaction

(+)-**6Eb**, 99% ee  
Product of QD-1d catalyzed  
reaction

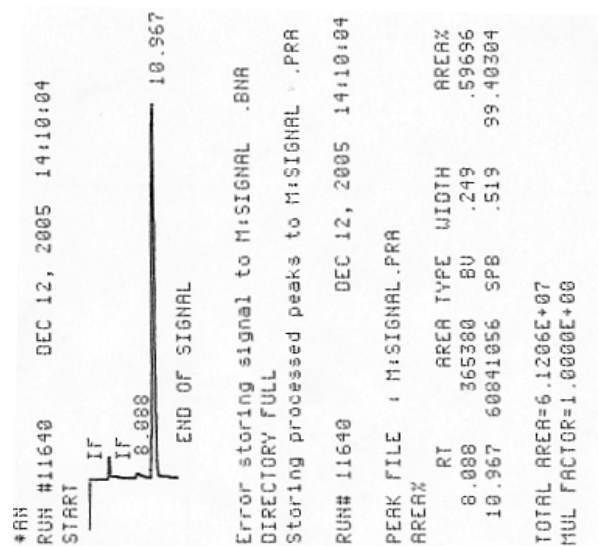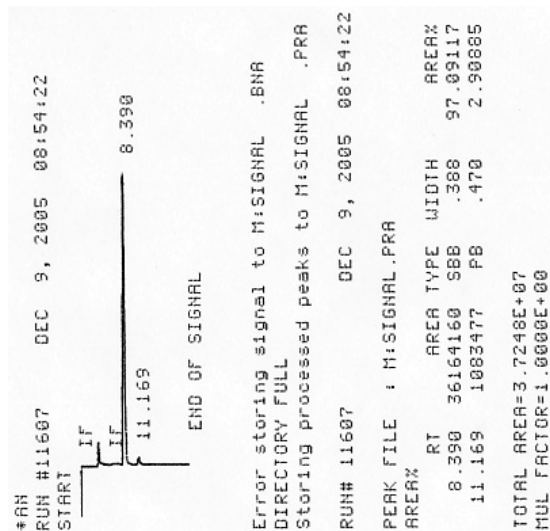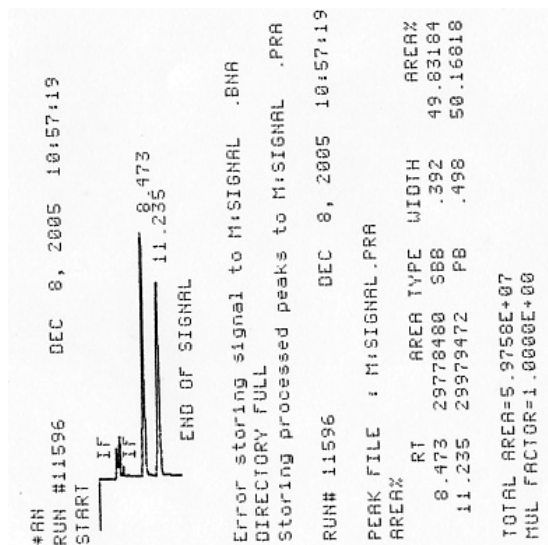

HPLC Condition: Daicel Chiralcel OD, Hexane / IPA = 90 / 10, 1.0 ml·min<sup>-1</sup>, 220 nm

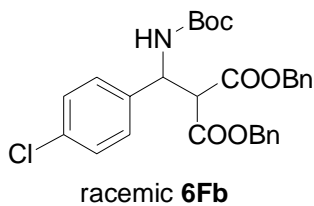

(-)-**6Fb**, 91% ee  
Product of Q-1d catalyzed  
reaction

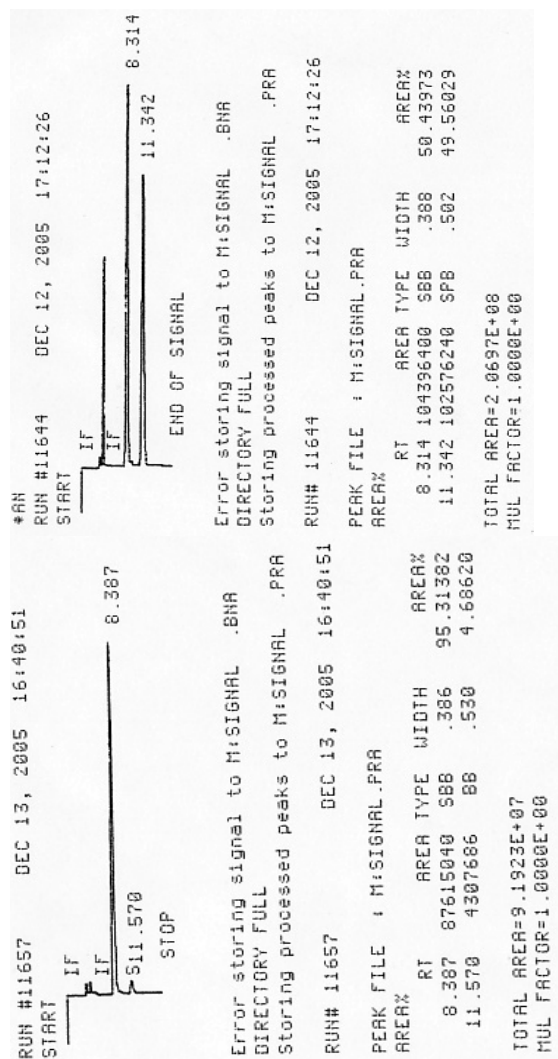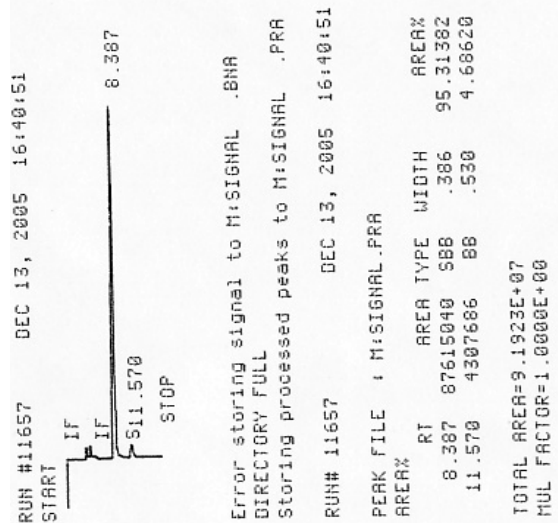

(+)-**6Fb**, 99% ee  
Product of QD-1d catalyzed  
reaction

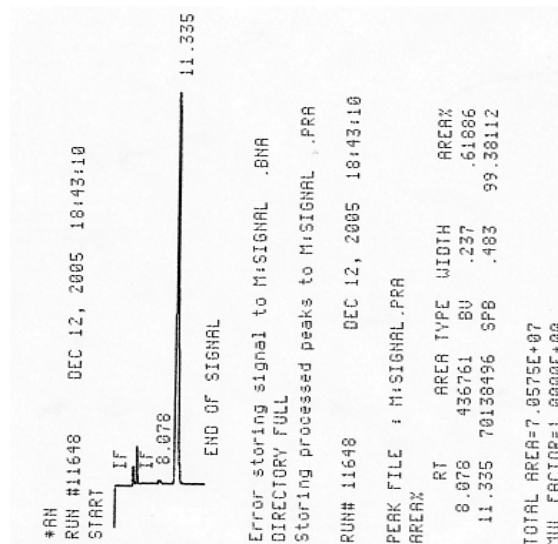



HPLC Condition: Daicel Chiralcel OD, Hexane / IPA = 90 / 10, 1.0 ml·min<sup>-1</sup>, 220 nm

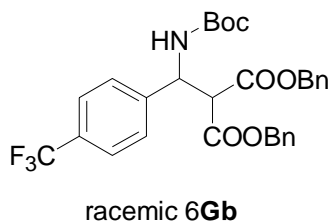

(-)-**6Gb**, 93% ee  
Product of Q-**1d** catalyzed  
reaction

(+)-**6Gb**, 97% ee  
Product of QD-**1d** catalyzed  
reaction

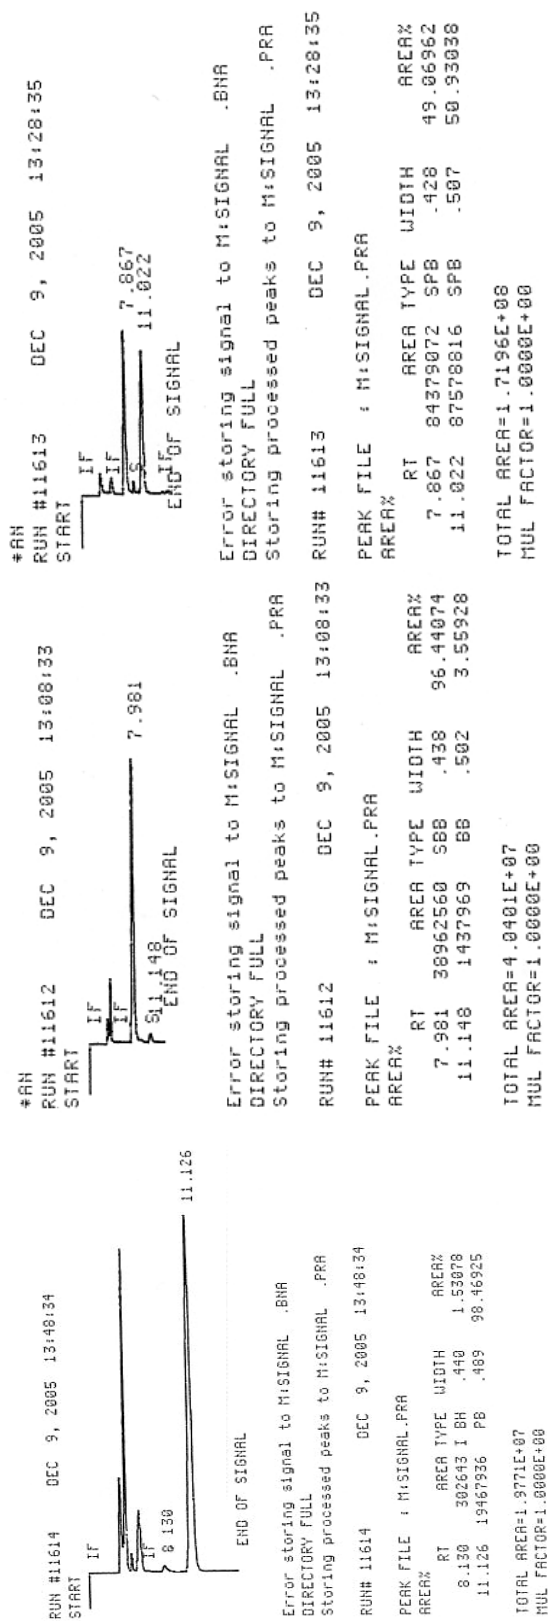

HPLC Condition: Daicel Chiralcel AD, Hexane / IPA = 85 / 15, 1.0 ml·min<sup>-1</sup>, 220 nm

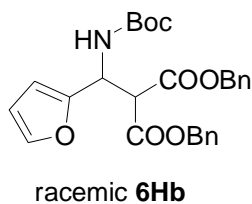

(-)-**6Hb**, 96% ee  
Product of Q-1d catalyzed  
reaction

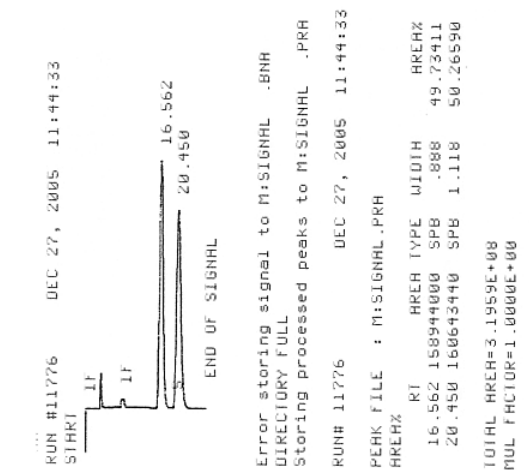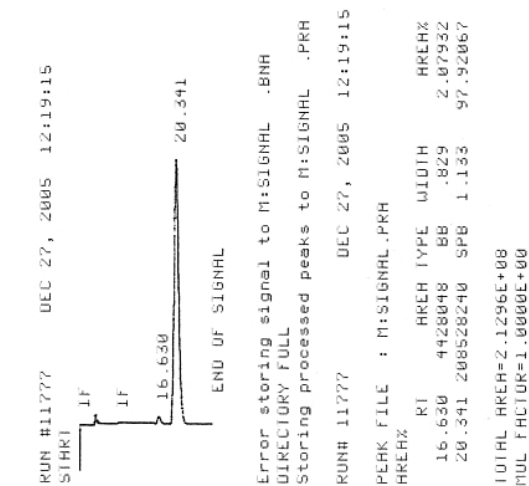

(+)-**6Hb**, 97% ee  
Product of QD-1d catalyzed  
reaction

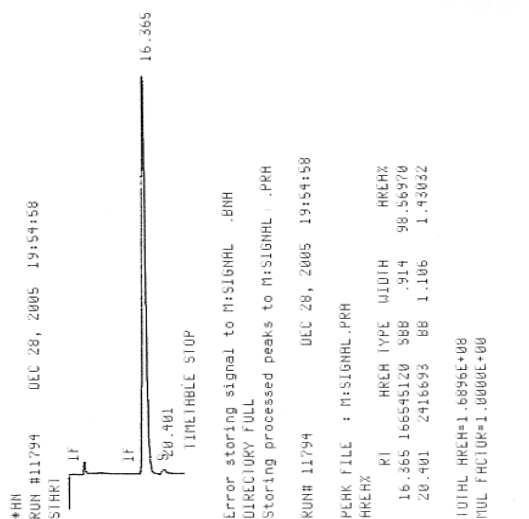

HPLC Condition: Daicel Chiralcel OD, Hexane / IPA = 98 / 2, 1.0 ml·min<sup>-1</sup>, 220 nm

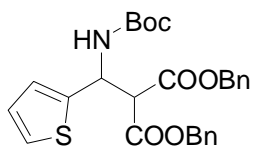

racemic **61b**

(-)-**61b**, 88% ee  
Product of Q-**1d** catalyzed  
reaction

(+)-**61b**, 97% ee  
Product of QD-**1d** catalyzed  
reaction

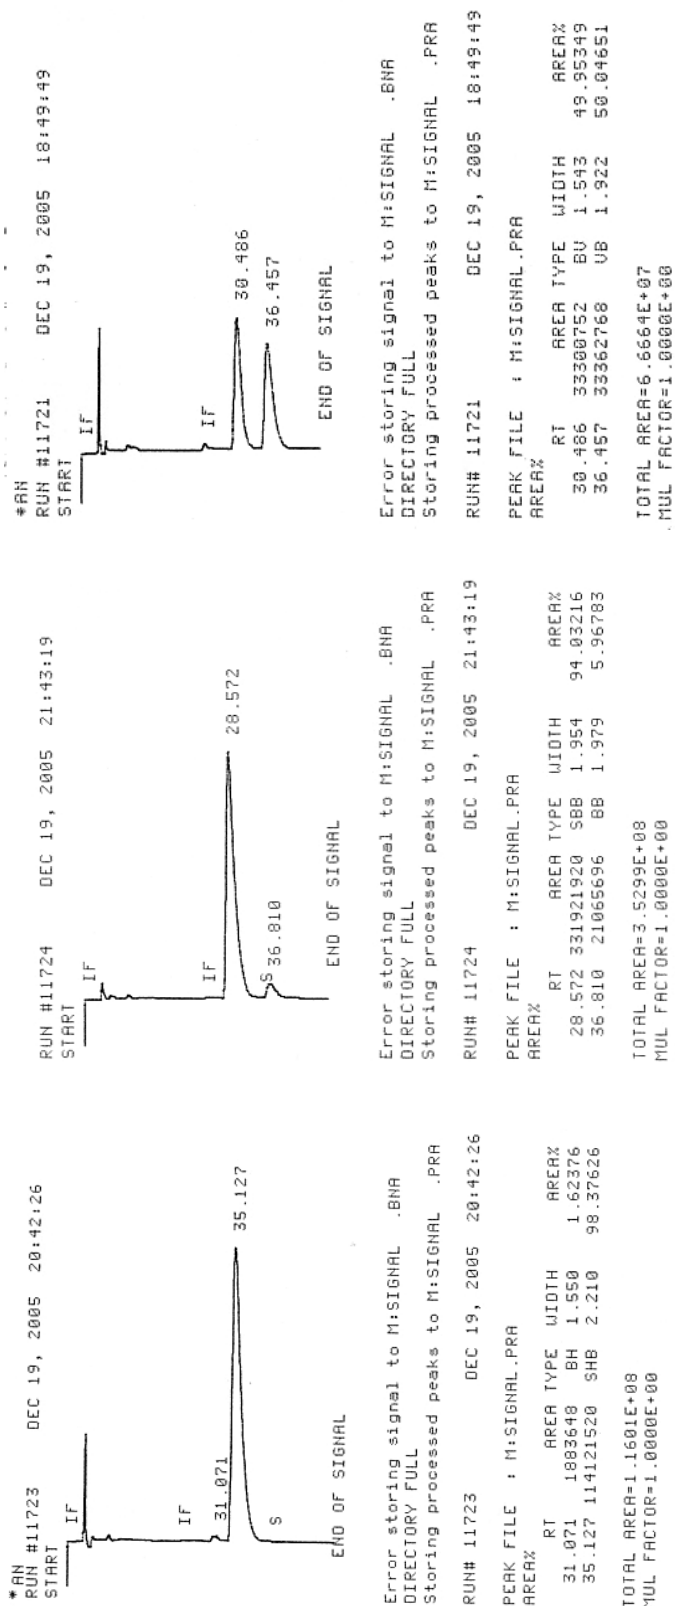

HPLC Condition: Daicel Chiralcel OD, Hexane / IPA = 90 / 10, 1.0 ml·min<sup>-1</sup>, 220 nm

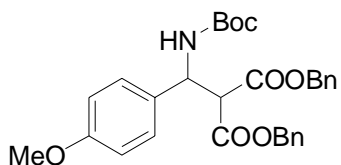

racemic **6Jb**

(-)-**6Jb**, 93% ee  
Product of Q-**1d** catalyzed  
reaction

(+)-**6Jb**, 97% ee  
Product of QD-**1d** catalyzed  
reaction

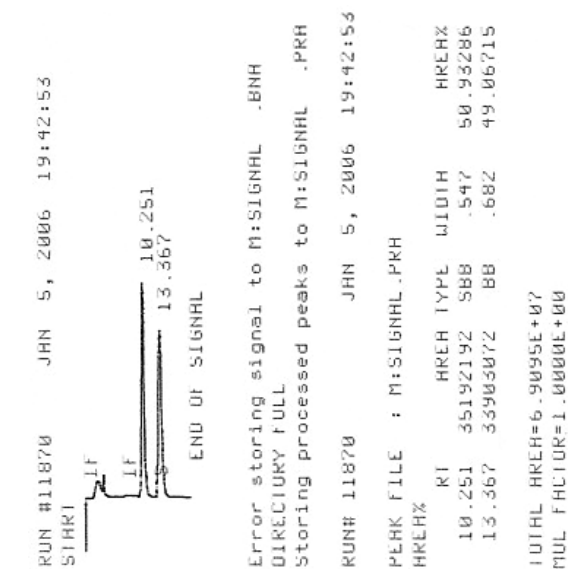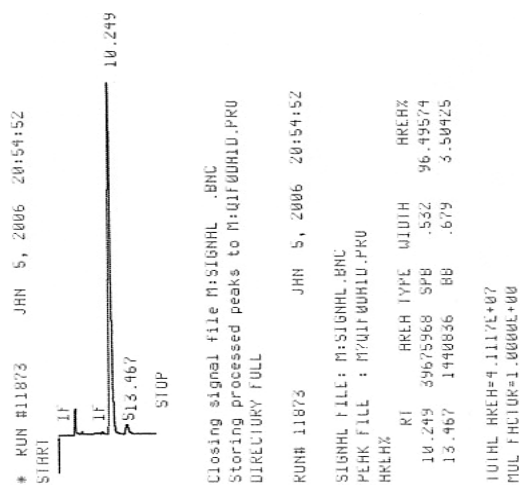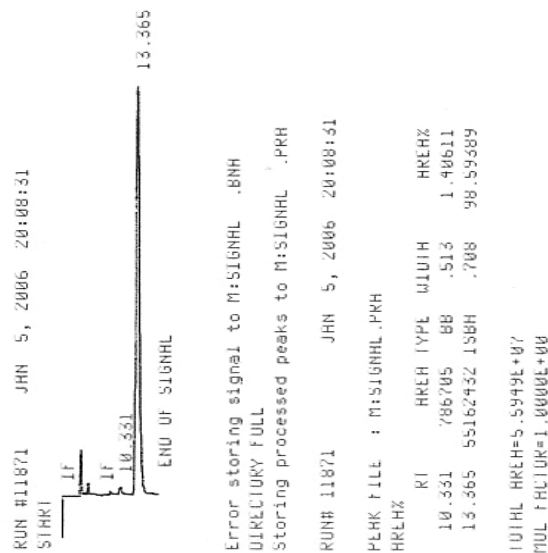

HPLC Condition: Daicel Chiralcel OD, Hexane / IPA = 90 / 10, 1.0 ml·min<sup>-1</sup>, 220 nm

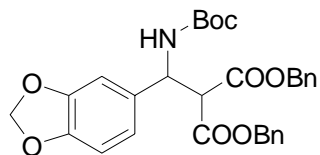

racemic **6Kb**

(-)-**6Kb**, 94% ee  
Product of **Q-1d** catalyzed  
reaction

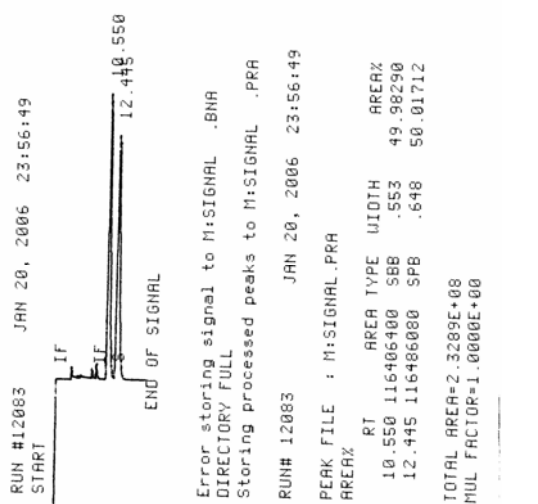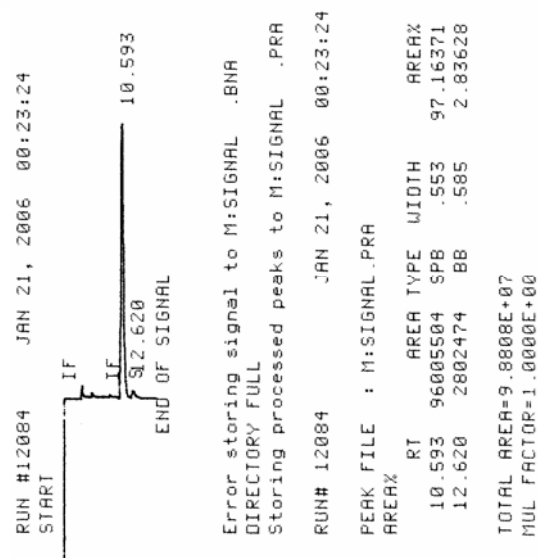

(+)-**6Kb**, 98% ee  
Product of **Q-1d** catalyzed  
reaction

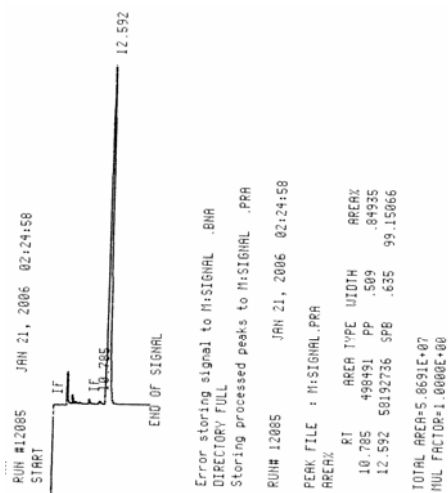

HPLC Condition: Daicel Chiralpak AS, Hexane / IPA = 98 / 2, 1.0 ml·min<sup>-1</sup>, 220 nm

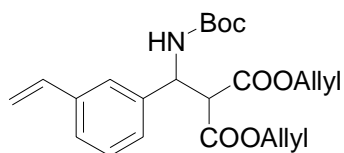

racemic **6Lc**

(-)-**6Lc**, 95% ee  
Product of **Q-1d** catalyzed  
reaction

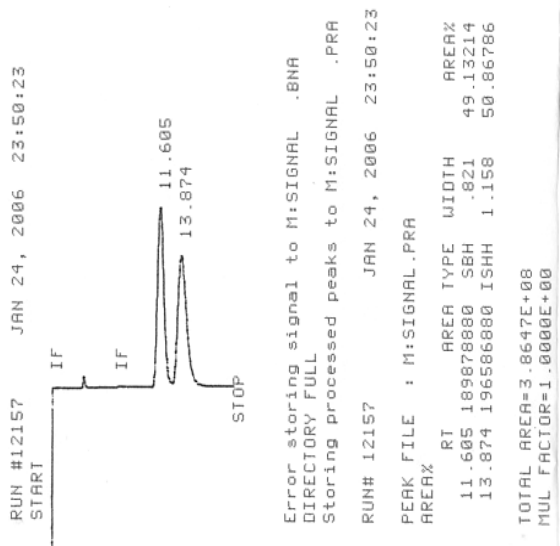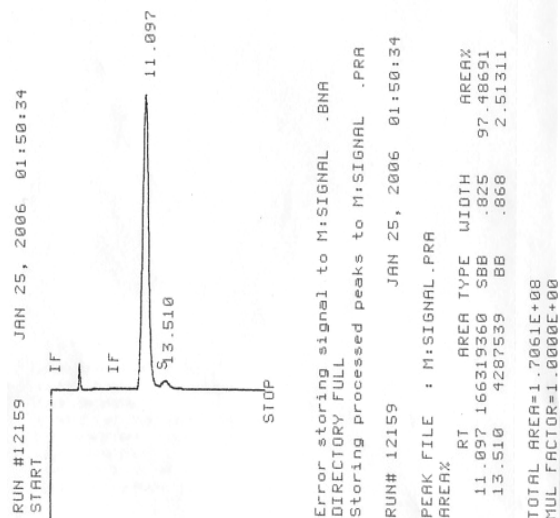

(+)-**6Lc**, 96% ee  
Product of **QD-1d** catalyzed  
reaction

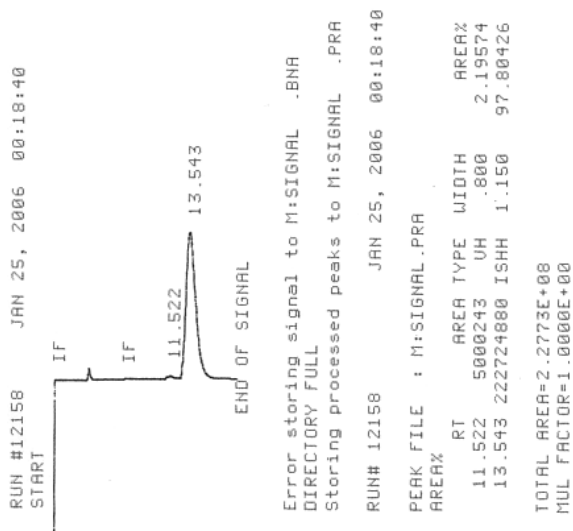



HPLC Condition: Daicel Chiralcel OD, Hexane / IPA = 98 / 2, 1.0 ml·min<sup>-1</sup>, 220 nm

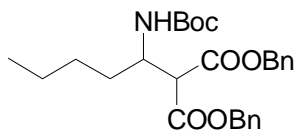

racemic **6Nb**

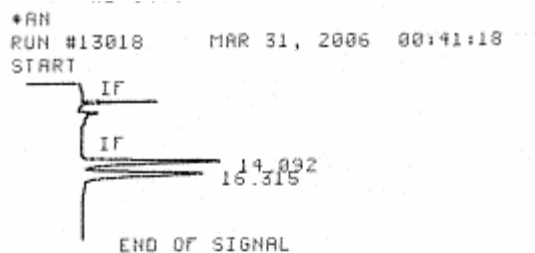

Error storing signal to M:SIGNAL .BNA  
DIRECTORY FULL  
Storing processed peaks to M:SIGNAL .PRA

RUN# 13018 MAR 31, 2006 00:41:18

PEAK FILE : M:SIGNAL.PRA  
AREAX

| RT     | AREA     | TYPE | WIDTH | AREAX    |
|--------|----------|------|-------|----------|
| 14.092 | 32275392 | BU   | .792  | 49.66435 |
| 16.315 | 32711648 | UB   | .925  | 50.33563 |

TOTAL AREA=6.4987E+07  
MUL FACTOR=1.0000E+00

\*AN  
RUN #13019 MAR 31, 2006 01:29:41  
START

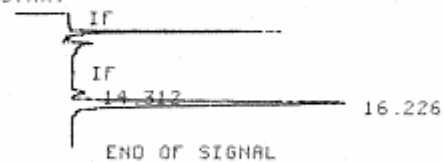

Error storing signal to M:SIGNAL .BNA  
DIRECTORY FULL  
Storing processed peaks to M:SIGNAL .PRA

RUN# 13019 MAR 31, 2006 01:29:41

PEAK FILE : M:SIGNAL.PRA  
AREAX

| RT     | AREA     | TYPE | WIDTH | AREAX    |
|--------|----------|------|-------|----------|
| 14.312 | 1503932  | PU   | .795  | 3.97286  |
| 16.226 | 36351200 | VU   | .899  | 96.02717 |

TOTAL AREA=3.7855E+07  
MUL FACTOR=1.0000E+00

(+)-**6Nb**, 92% ee  
Product of QD-1d catalyzed  
reaction



HPLC Condition: Daicel Chiralcel OD, Hexane / IPA = 97 / 3, 1.0 ml·min<sup>-1</sup>, 220 nm

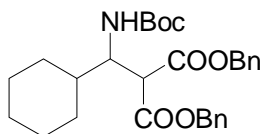

racemic **6Ob**

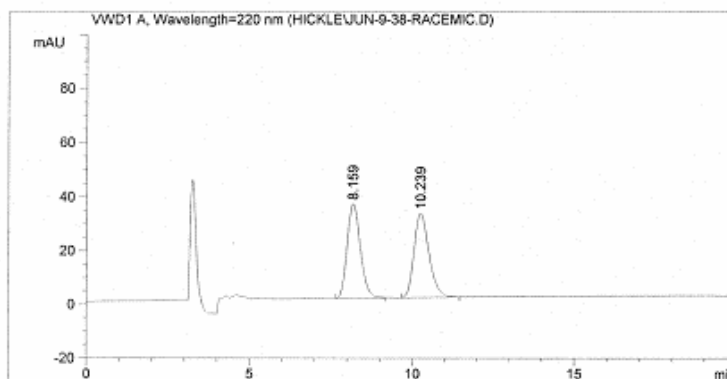

Signal 1: VWD1 A, Wavelength=220 nm

| Peak #   | RetTime [min] | Type | Width [min] | Area mAU *s | Height [mAU] | Area %  |
|----------|---------------|------|-------------|-------------|--------------|---------|
| 1        | 8.159         | BB   | 0.4384      | 985.72864   | 35.08925     | 49.4882 |
| 2        | 10.239        | BB   | 0.4965      | 1006.11560  | 31.37090     | 50.5118 |
| Totals : |               |      |             | 1991.84424  | 66.46015     |         |

(+)-**6Ob**, 88% ee  
Product of QD-**1d** catalyzed  
reaction

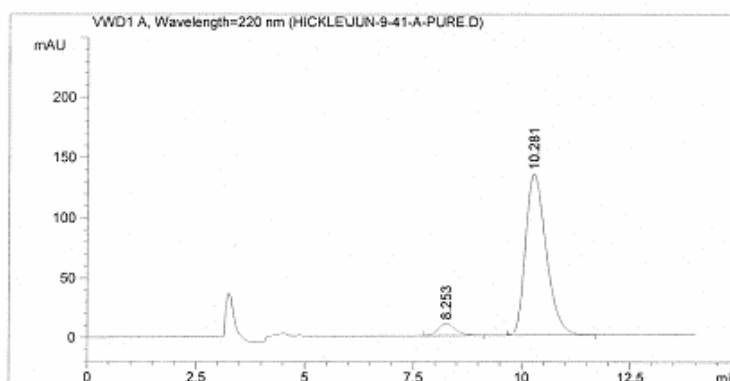

Signal 1: VWD1 A, Wavelength=220 nm

| Peak #   | RetTime [min] | Type | Width [min] | Area mAU *s | Height [mAU] | Area %  |
|----------|---------------|------|-------------|-------------|--------------|---------|
| 1        | 8.253         | BB   | 0.4310      | 281.01743   | 10.05146     | 5.9256  |
| 2        | 10.281        | BB   | 0.5156      | 4461.37402  | 134.33229    | 94.0744 |
| Totals : |               |      |             | 4742.39145  | 144.38375    |         |

HPLC Condition: Daicel Chiralcel OD, Hexane / IPA / TFA = 95 / 5 / 0.1, 1.0 ml·min<sup>-1</sup>, 220 nm, 0°C

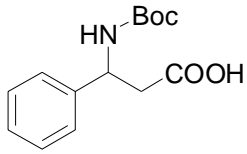

racemic **7Ab**

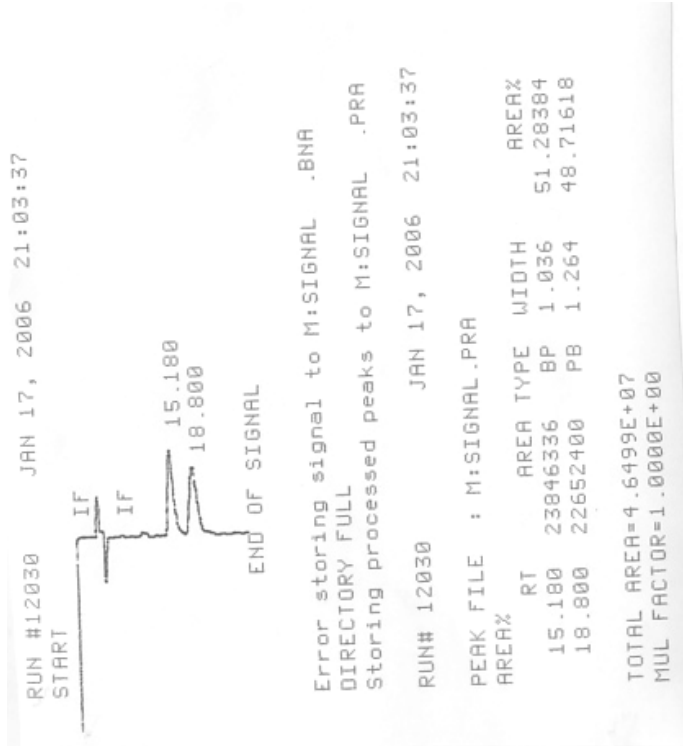

(S)(-)-**7Ab**, 94% ee  
 derived from (+)-**6Ab**

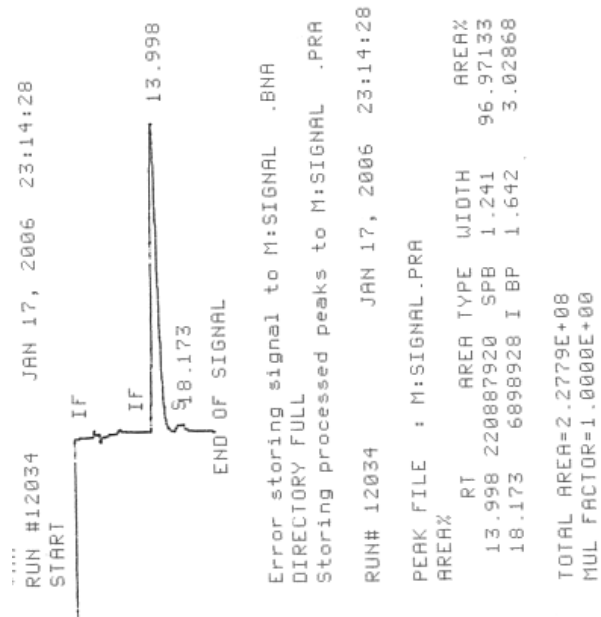

HPLC Condition: Daicel Chiralcel OD, Hexane / IPA / TFA = 98 / 2 / 0.1, 1.0 ml·min<sup>-1</sup>, 220 nm.

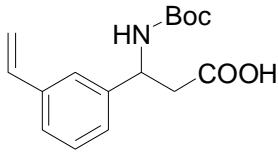

racemic **7Lc**

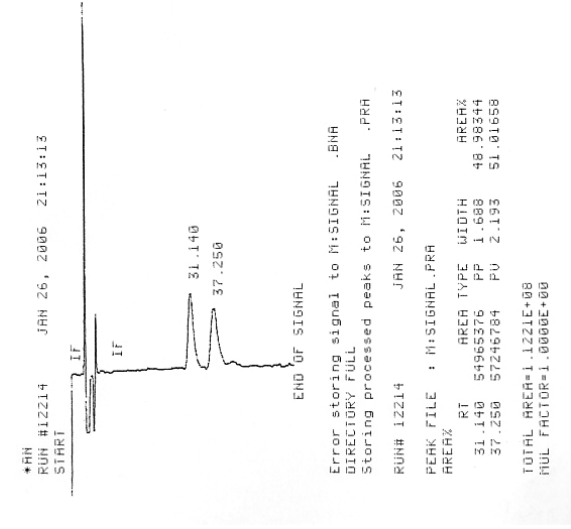

(-)-**7Lc** 97% ee  
derived from (+)-**6Lc**

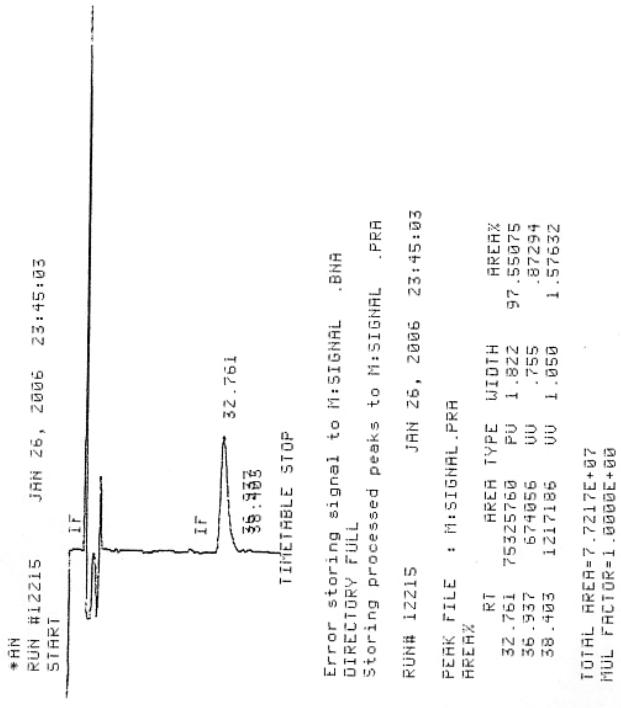

HPLC Condition: Regis Pirkle Covalent (*R, R*) Whelk-O 1, Hexane / IPA = 85 / 15,  
1.0 ml·min<sup>-1</sup>, 220 nm

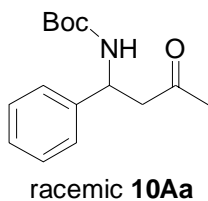

(-)-**10Aa**, 92% ee  
derived from **9Aa**  
(Product of QD-**1d**  
catalyzed reaction)

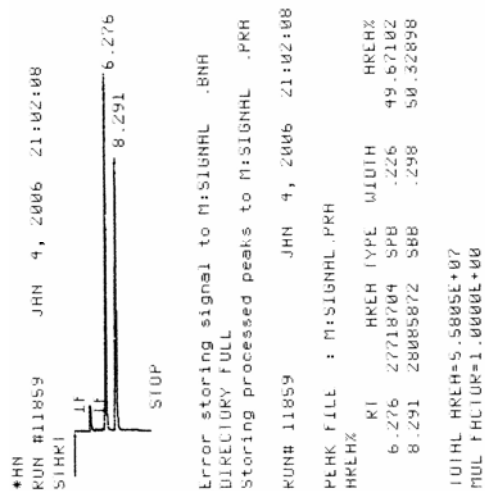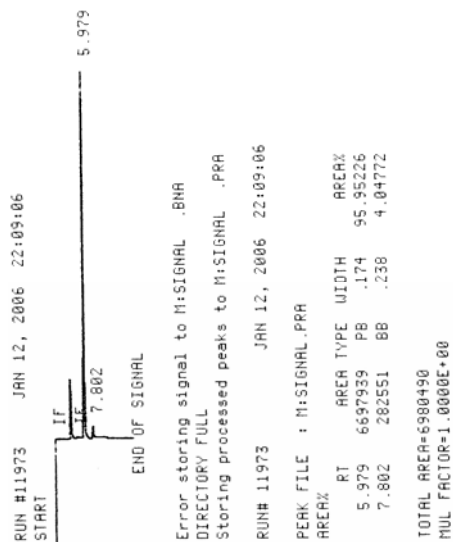

HPLC Condition: Regis Pirckle Covalent (*R,R*) Whelk-O 1 Column, Hexane / IPA  
 = 85 / 15, 1.0 ml·min<sup>-1</sup>,

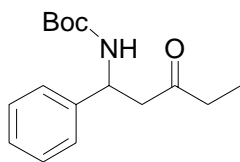

racemic **10Ab**

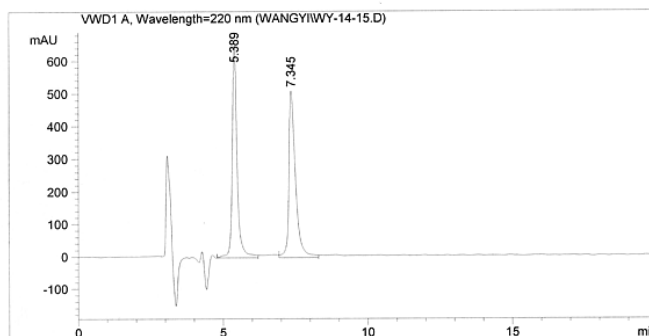

Signal 1: VWD1 A, Wavelength=220 nm

| Peak # | RetTime [min] | Type | Width [min] | Area mAU*s | Height [mAU] | Area %  |
|--------|---------------|------|-------------|------------|--------------|---------|
| 1      | 5.389         | BV   | 0.1766      | 7760.27588 | 652.31592    | 48.3264 |
| 2      | 7.345         | VV   | 0.2386      | 8297.76758 | 511.93216    | 51.6736 |

Totals : 1.60580e4 1164.24808

(-)-**10Ab**, 91% ee  
 derived from **9Ab** (Product of  
 QD-**1d** catalyzed reaction)

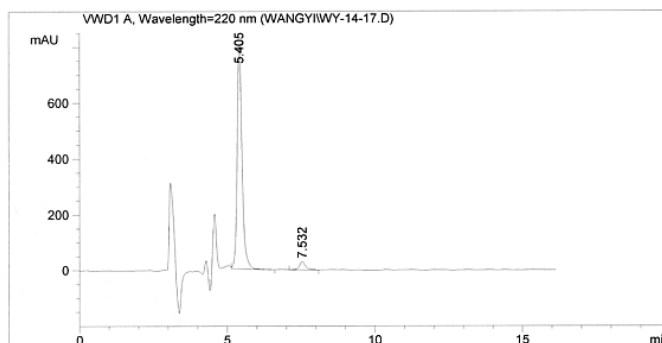

Signal 1: VWD1 A, Wavelength=220 nm

| Peak # | RetTime [min] | Type | Width [min] | Area mAU*s | Height [mAU] | Area %  |
|--------|---------------|------|-------------|------------|--------------|---------|
| 1      | 5.405         | VV   | 0.1756      | 9224.90430 | 798.40521    | 95.2762 |
| 2      | 7.532         | VV   | 0.2238      | 457.36768  | 29.63161     | 4.7238  |

Totals : 9682.27197 828.03683

HPLC Condition: Daicel Chiralpak AS, Hexane / IPA = 98 / 2, 1.0 ml·min<sup>-1</sup>, 220 nm

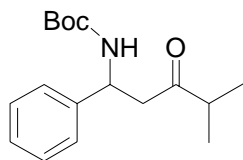

racemic **10Ac**

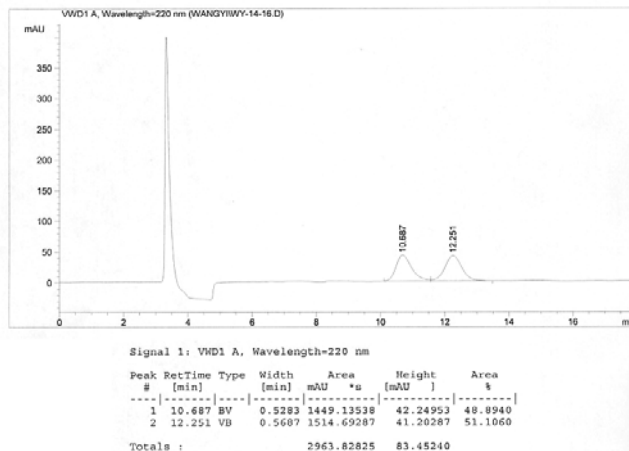

(+)-**10Ac**, 92% ee  
derived from **9Ac** (Product of **Q-1d**  
catalyzed reaction)

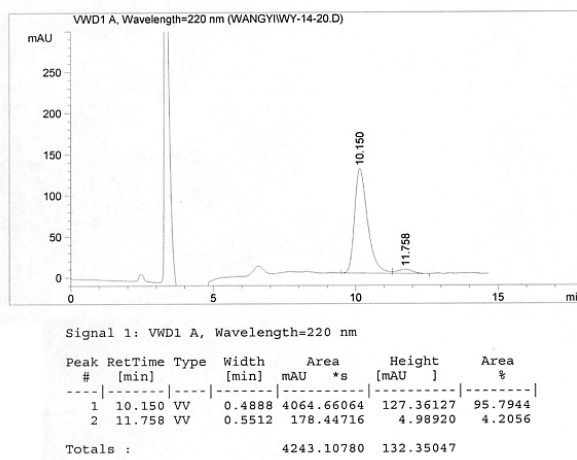

(-)-**10Ac**, 96% ee  
derived from **9Ac** (Product of **QD-1d**  
catalyzed reaction)

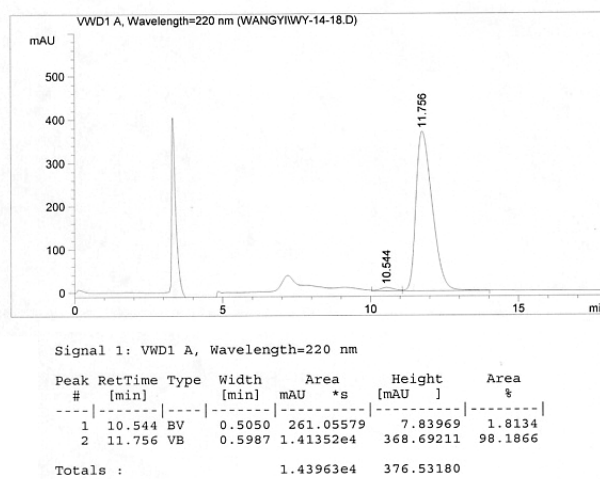

Supplement: NIHMS63668-supplement-1si20060405_10.pdf [file NIHMS63668-supplement-1si20060405_10.pdf]
